# Supplementary material for: Designing Prepregnation and Fused Filament Fabrication Parameters for Recycled PP- and PA-Based Continuous Carbon Fiber Composites
Source: MDPI journal article supplement (doi:10.3390/ma17081788), 2024-04-12
Supplement: s1 [file s1]

Supporting Information for

# **Designing prepregnation and fused filament fabrication parameters for recycled PP- and PA-based-continuous carbon fiber composites**

Marah Baddour<sup>1</sup>, Ruth Garcia-Campà<sup>2</sup>, Pablo Reyes,<sup>1,3</sup> Dagmar R. D'hooge <sup>3,4</sup>, Ludwig Cardon<sup>1</sup>, and Mariya Edeleva<sup>1</sup>

<sup>1</sup> Centre for Polymer and Material Technologies, Department of Materials, Textiles and Chemical Engineering, Ghent University, Technologiepark 130, 9052 Zwijnaarde, Belgium;

<sup>2</sup>Leitat Technological Center, C/Innovacio 2, 08225 Terrassa, Barcelona, Spain

<sup>3</sup>Laboratory for Chemical Technology, Department of Materials, Textiles, and Chemical Engineering, Ghent University, Technologiepark 125, 9052 Zwijnaarde, Belgium;

<sup>4</sup> Centre for Textile Science and Engineering, Department of Materials, Textiles, and Chemical Engineering, Ghent University, Technologiepark 70a, 9052 Zwijnaarde, Belgium;

Corresponding author: mariya.edeleva@ugent.be

## General information

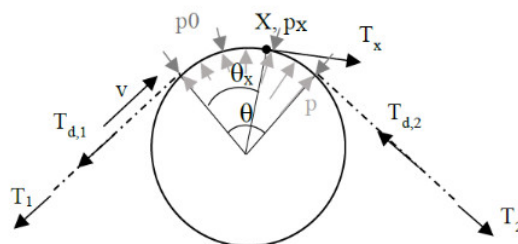

Figure S1. Cross-section of a spreader pin and fiber bundle (dashed line) forces.

Table S1. The properties of the cCF and the polymers matrices.

| Material   | Tensile strength (MPa) | Young Modulus (GPa) | Yield strain (%) | Flexural strength (MPa) | Density (g/cm <sup>3</sup> ) | T <sub>m</sub> (°C) |
|------------|------------------------|---------------------|------------------|-------------------------|------------------------------|---------------------|
| PP         | 19*                    | 1                   | 8                | 17                      | 0.90                         | 164                 |
| PA12       | 42*                    | 1.45                | 7                | 45                      | 1.02                         | 178                 |
| T300B-3000 | 3530                   | 230                 | 1.26             | (3530)**                | 1.76                         | /                   |

\* These values are the yield stress of the PP & PA12 reported by the materials datasheet as the ultimate tensile stress was not given. \*\* Tensile strength from the datasheet is reported.

Table S2. Dimensions of ISO-14125 flexural specimens (ISO-14125).

| Method             | Length <i>l</i> (mm) | Width <i>b</i> (mm) | Thickness <i>h</i> (mm) | Distance between supports <i>L</i> (mm) | Distance between loads <i>L'</i> (mm) |
|--------------------|----------------------|---------------------|-------------------------|-----------------------------------------|---------------------------------------|
| Method A, Class IV | 100                  | 15                  | 2                       | 80                                      | /                                     |
| Method B, Class IV | 100                  | 15                  | 2                       | 81                                      | 27                                    |
| Tolerances         | +10<br>-0            | ± 0,5               | ± 0.2                   | ± 1                                     | ± 1                                   |

## Morphology analysis via SEM and optical microscopy

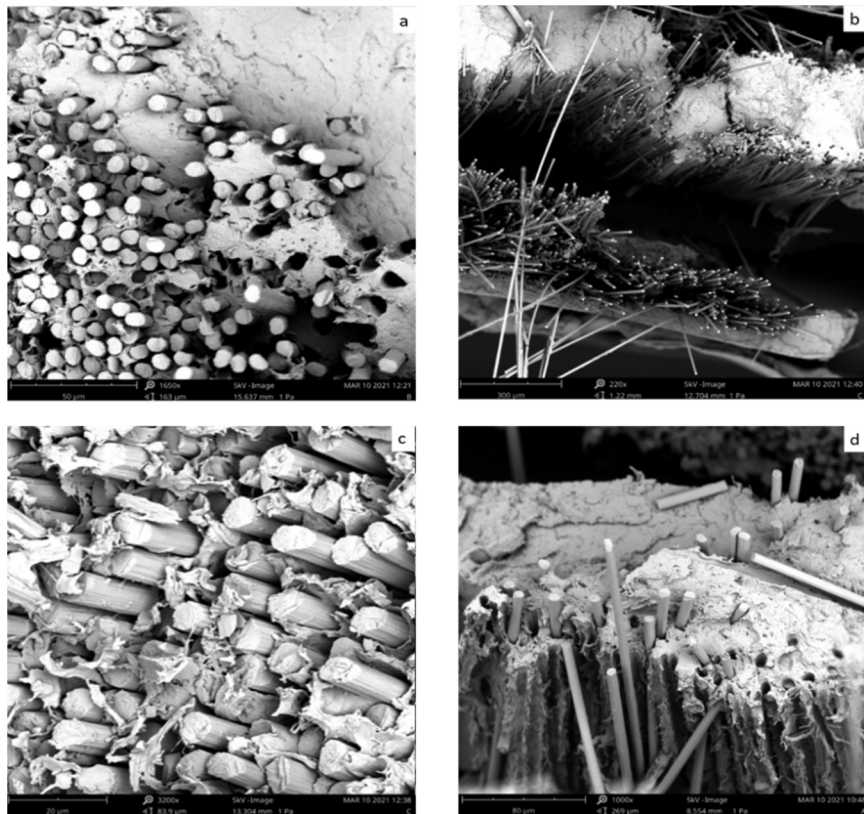

Figure S2. SEM results of PP composite obtained from printing F001. a) Compression fracture, b) Delamination zone, c) Poor interfacial interaction between the matrix and the fiber, and d) Broken fibers inside the matrix.

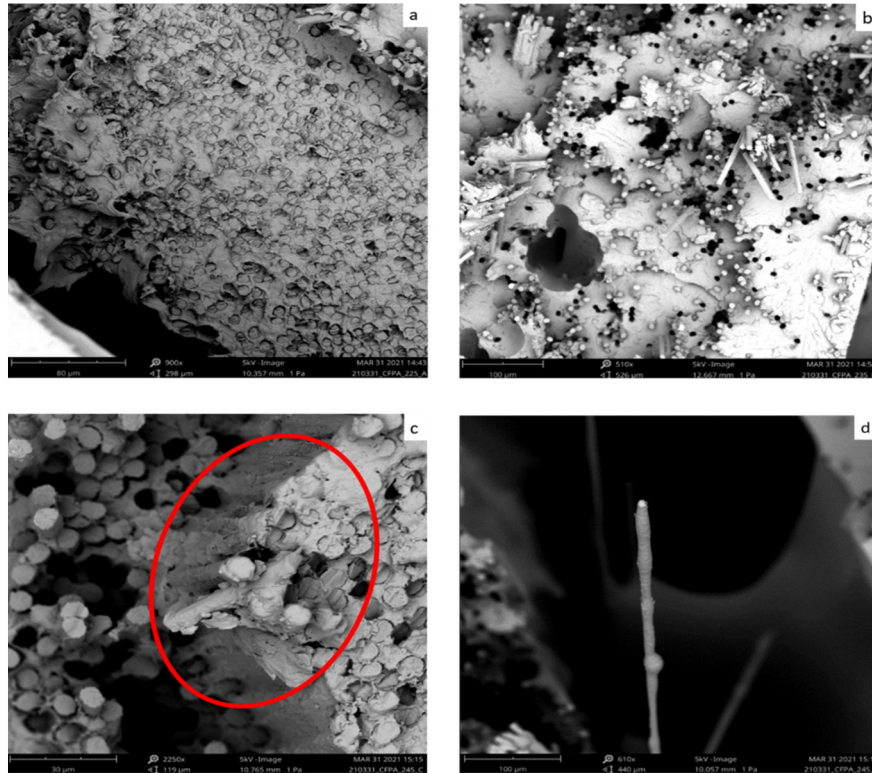

Figure S3. SEM results of PA12 composite obtained from F013. a) CF dispersion in the matrix PA12, b) Compressive fracture for composites, c) Interfacial interaction between the matrix and the fiber, and d) Individual fiber that is fully coated with PA12.

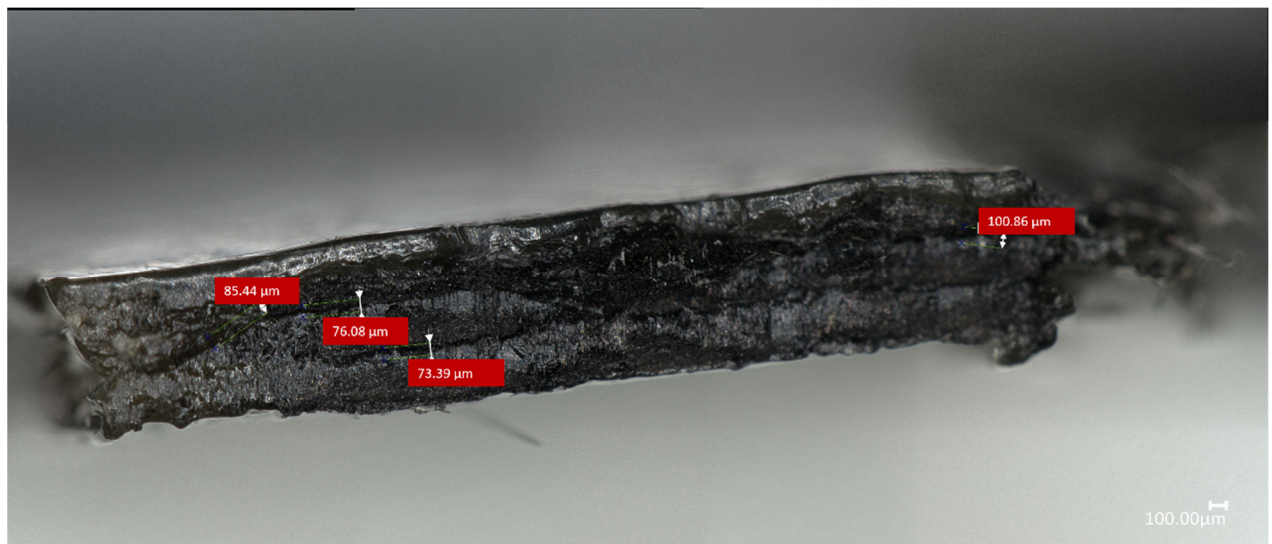

Figure S4. Cross section of the annealed sample made with CF-PA12.



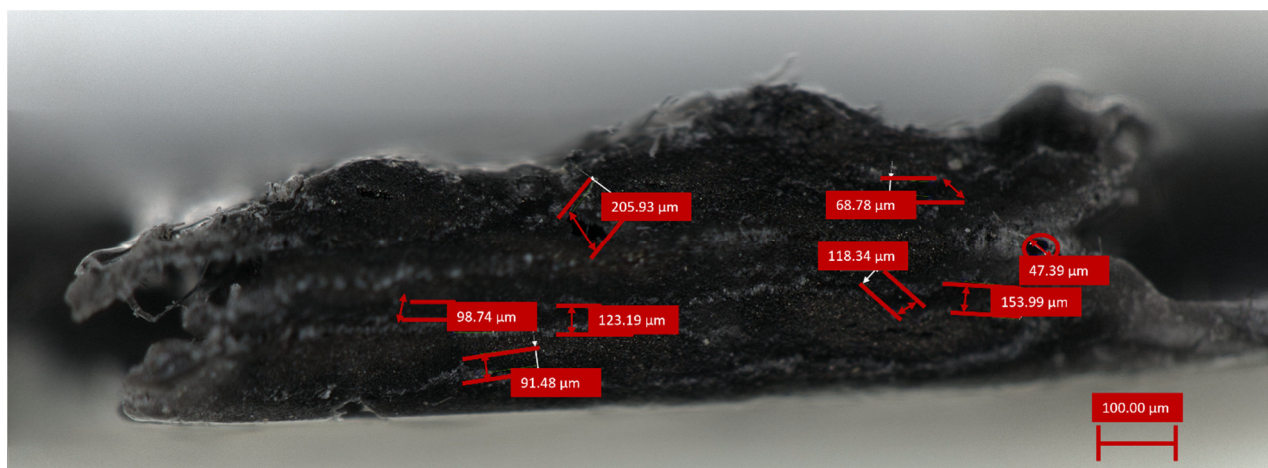

Figure S5. Cross section of the annealed sample made with CF-PP.

## Rheological properties

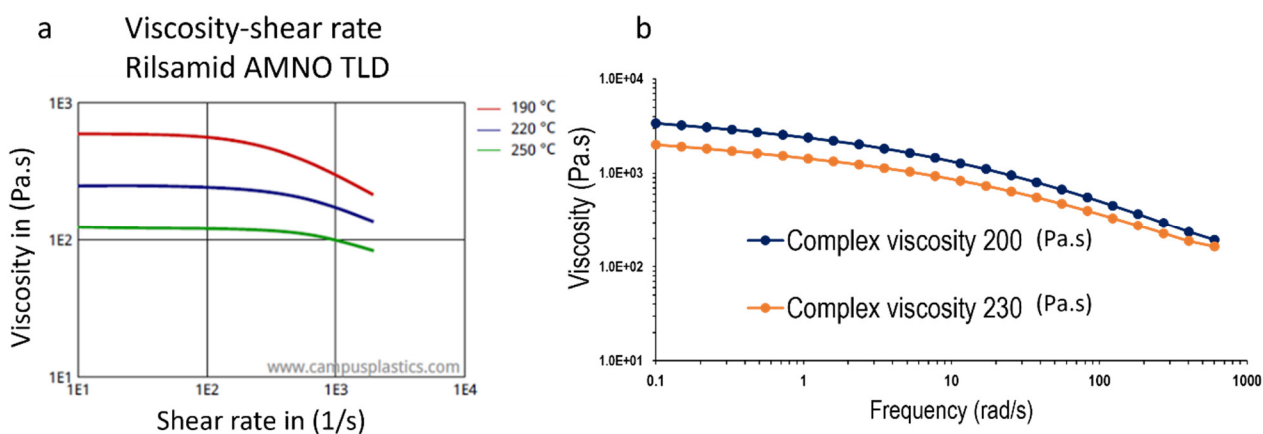

Figure S6. Viscosity vs. shear rate temperature dependence for a): PA12 matrix and b): PP matrix.

Table S3. The estimated shear rate for PP during the printing process.

| T (°C) | Q (cm <sup>3</sup> /s) | Melt density (g/cm <sup>3</sup> ) | $\gamma' a$ (s <sup>-1</sup> ) | $\gamma' w$ (s <sup>-1</sup> ) |
|--------|------------------------|-----------------------------------|--------------------------------|--------------------------------|
| 215    | 0.02                   | 0.50                              | 17                             | 34                             |
| 225    | 0.01                   | 0.73                              | 17.04                          | 34.08                          |
| 235    | 0.01                   | 0.74                              | 16.89                          | 33.78                          |

Table S4. The results of the voids analysis of PP printed samples.

| Sample code | count | Total area ( $\mu\text{m}^2$ ) | Average size ( $\mu\text{m}^2$ ) | Area (%) | Mean ( $\mu\text{m}$ ) |
|-------------|-------|--------------------------------|----------------------------------|----------|------------------------|
| P062        | 5454  | 78834.92                       | 14.45                            | 4.5      | 5.15                   |
| P076        | 6733  | 82975.77                       | 12.32                            | 4.9      | 6.285                  |

## Theoretical support for Equation (6) in the main text

During the deposition, a thermoplastic-based filament with a circular cross-section with diameter  $d_1$  is fed through a heated nozzle with an internal diameter  $d_2$ , which is often smaller than  $d_1$ , and deposited on the printing platform. The orientation of the composite strand changes from normal to the deposition platform to parallel to the deposition platform (Figure S7 A). In the studied FFF process, the velocity  $v_1$  of the composite in the nozzle should be equal to deposition velocity  $v_2$  (Equation S1). The main reason for this is the high Young's modulus of a typical fiber material, which remains in the solid phase during processing.

$$v_1 = v_2 \quad \text{Eq. S1.}$$

Furthermore, due to the deformability of the melted composite strand, the form changes from a circular cross-section to a rectangular one with semi-circular ends (Figure S7 B). The cross-sectional surface area of the strand can be calculated based on the geometrical scheme in Figure S7 B assuming the radius of the spherical ends being  $r$ ,  $h$  – the layer thickness, and  $w$  – track width.

$$S_{stand} = w \times h - 4 \times r^2 \left(1 - \frac{\pi}{4}\right) \quad \text{Eq. S2}$$

The maximal value for  $r$  can be  $h/2$  which gives:

$$S_{stand} = w \times h - h^2 \left(1 - \frac{\pi}{4}\right) = h \times \left(w - h \left(1 - \frac{\pi}{4}\right)\right) = \text{"height"} \times \text{"length"} \quad \text{Eq. S3}$$

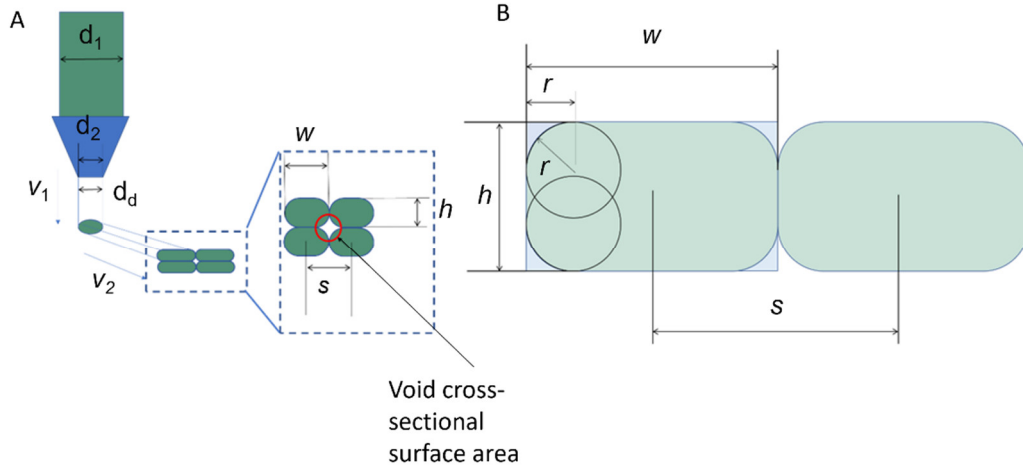

Figure S7. A: Deformation of the printing filament during the FFF process. B: Cross-section of the printed strand.

Based on Equation S1 and the law of mass conservation, it can be said that the composite strand's cross-sectional area is equal to the filament's cross-sectional area at a given temperature and time.

As a result, Equation S3 gives the relation between the diameter of the filament  $d_d$ , the height  $h$ , and width  $w$  of a deposited composite track. In practice,  $d_d$  and  $h$  are predefined, and the resulting track width is given in Equation S4. By changing the inter-path distance  $s$ , i.e. the distance between the centers of two adjacent and parallel composite tracks can be adapted.

$$\frac{\pi d_d^2}{4} = (w - h)h + \frac{\pi h^2}{4} \quad \text{Eq. S4}$$

$$w = \frac{\pi d_d^2}{4h} + h \left(1 - \frac{\pi}{4}\right) \quad \text{Eq. S5}$$

In the context of FFF, a tool path can be defined as the movement of an extruder/deposition nozzle relative to the build platform, which is necessary to build up a three-dimensional object. The tool path for the production of a unidirectional composite layer will consist of parallel tool paths with an inter-path distance  $s$ .

$$s = w \quad \text{Eq. S6}$$

A value for  $s$  equal to  $w$  ensures that the individual tracks are making contact (Figure S7), but this inherently leads to a certain macroscopic void surface fraction  $S_{v,mac}$  in between the individual deposited tracks, as highlighted in Figure S7 A with the red circle.  $S_{v,mac}$  can be determined via Equation S7 which is derived via a simple geometrical sketch as shown in Figure S7 B. Note that  $S_{v,mac}$  refers to the macroscopic voids in between composite tracks, not including the microscopic voids within an individual composite track after its deposition ( $S_{v,mic}$ ) which is caused by material degradation.

$$S_{v,mac} = h \times h \left(1 - \frac{\pi}{4}\right) \quad \text{Eq. S7}$$

In theory, it is possible to reduce or even eliminate macro-voids in a composite object by depositing slightly overlapping tracks, *i.e.* choosing  $s < w$ . In practice, to obtain an optimum between density and printability we can define a macro-void filling factor  $\xi$  between 0 and 1 which is determined experimentally (Equation S8).

$$s = w - \xi \cdot h \cdot \left(1 - \frac{\pi}{4}\right) \quad \text{Eq. S8}$$

This equation is formed in the following way: we transform the “length” term from eq. S3 with an overlap macro-void filling factor. In this,  $\xi = 0$  corresponds to  $s = w$  and a  $S_{v,mac}$  as calculated in Equation S7, while  $\xi = 1$  corresponds to  $s = s_{min}$  (Equation S8) and  $S_{v,mac} = 0$ . However, due to limitations in the deformability of the strands being deposited, a situation in which a track is partially deposited on top of another track in the same layer, instead of filling up the existing voids, can occur for high values of  $\xi$  (Figure S8 A). This effect leads to reduced printability and will induce fiber failure during deposition. In practice, an  $\xi$ -value of around 0.5 is realistic. In this case, the lower half of the rhombic macro-void cross-sections are filled making a trapezoid with semi-rounded ends as shown in Figure S7 B.

$$s_{min} = w - h \left(1 - \frac{\pi}{4}\right) = \frac{\pi d_d^2}{4h} \quad \text{Eq. S9}$$

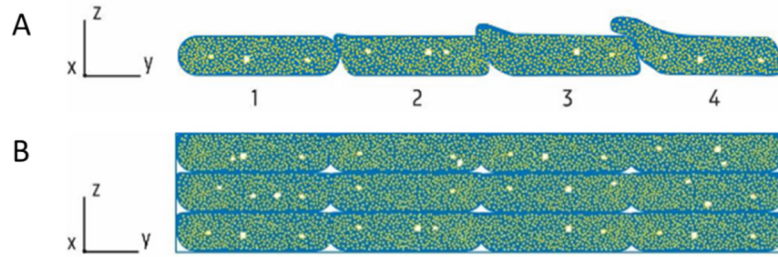

Figure S8. A: The effect of partially overlapping composite tracks, where  $s \ll w$  and  $\xi \approx 1$ . The order of strand deposition is indicated by increasing numbers. Cross-section of a single-layer composite perpendicular to the fiber direction. B: Reduction of the macro-void content by slightly overlapping the composite tracks, where  $\xi = 0.5$ . Cross-section of a triple-layer composite perpendicular to the fiber direction.

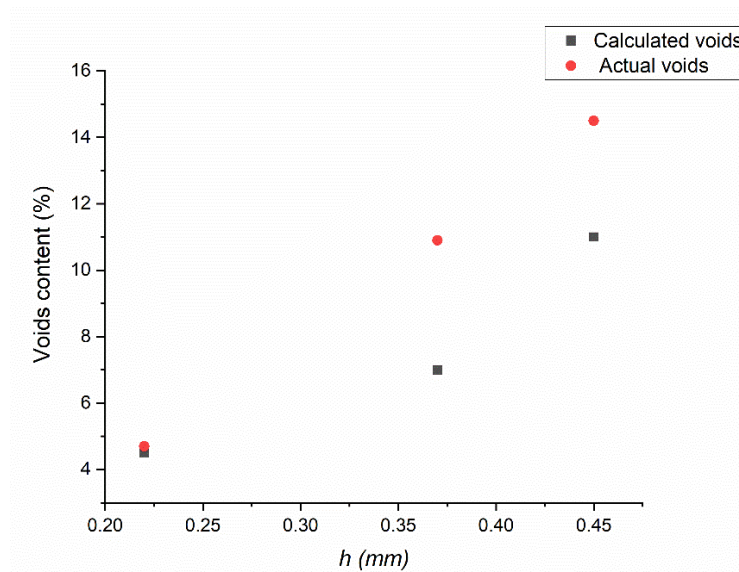

Figure S9. The relationship between  $h$  and the voids showcases a comparison between calculated and actual values.

## Flexural testing

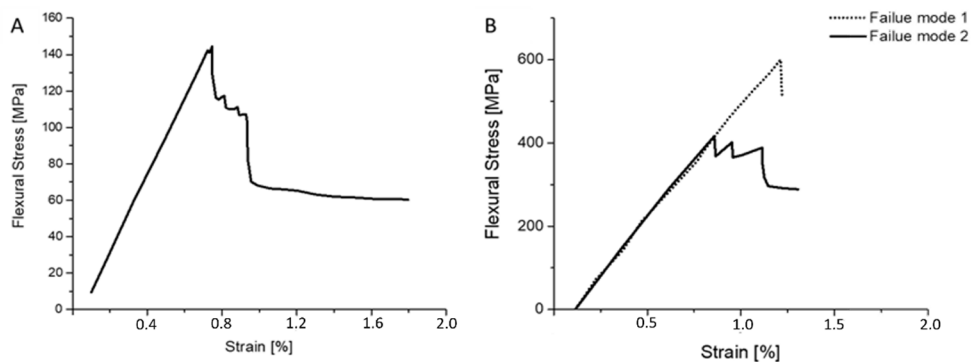

Figure S10. Averaged flexural stress curve of A: cCF-PP (Specimen F001, Printing conditions P002, Table S8), B: cCF-PA12 (Specimen F007 and F009, Printing conditions P107-P113, Table S8.).

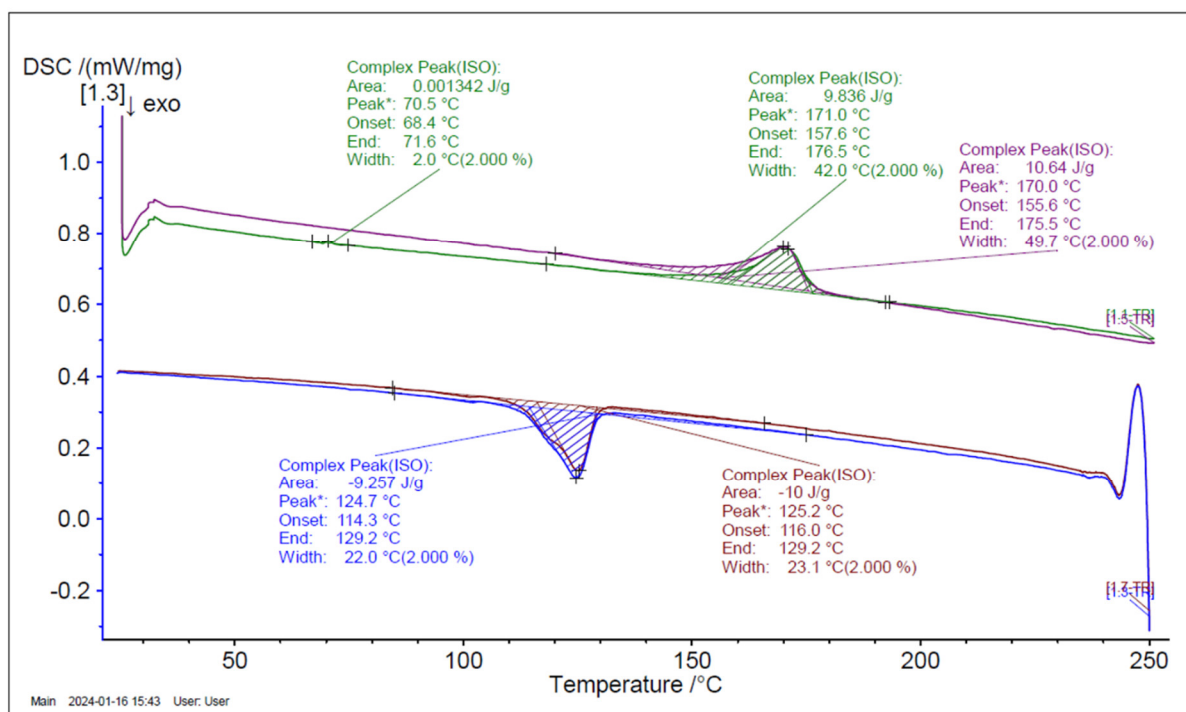

Figure S11. DSC results for PP-cCF samples taken from a broken area ( peak \*:the location of the peak maximum).



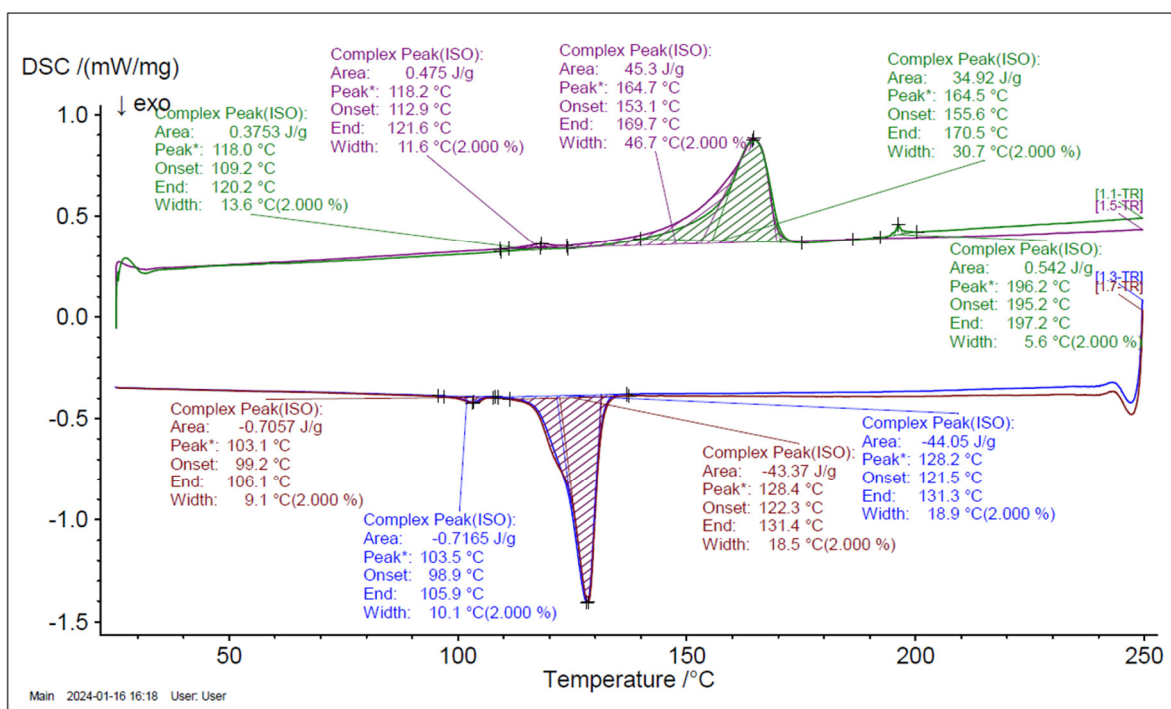

Figure S12. DSC results for PP-cCF samples were taken from samples that did not undergo the flexural test ( peak \*:the location of the peak maximum).

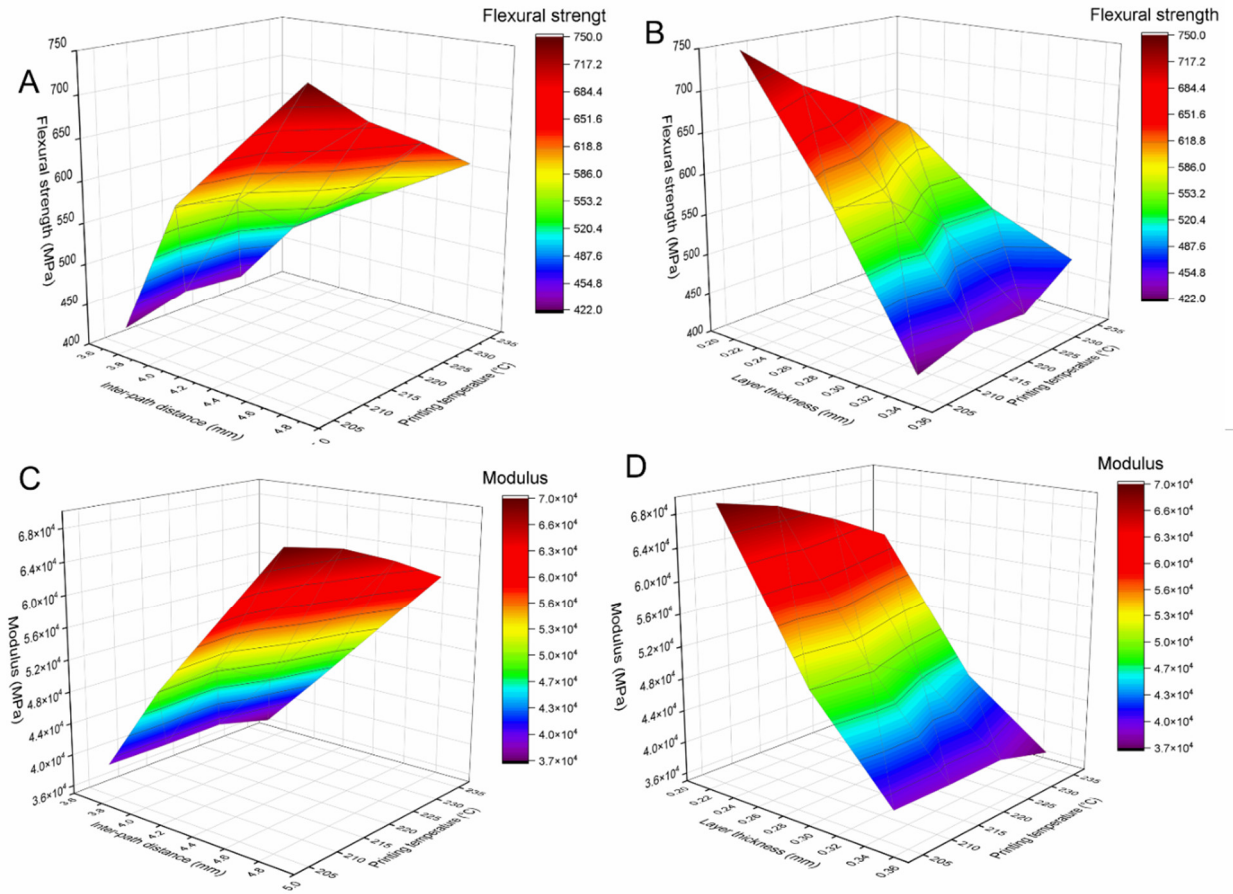

Figure S13. Response surface graphs of the relationship between A: Flexural strength  $\sigma_{flex}$ , inter-path distance, and printing temperature, and B: Flexural strength  $\sigma_{flex}$ , layer thickness, and printing temperature, C: Modulus  $E_{flex}$ , inter-path distance, and printing temperature, and D: Modulus  $E_{flex}$ , layer thickness, and printing temperature of the samples Specimens from F014 Printing conditions P154-P183 with  $D=0.7$  mm (PA12 as a polymer matrix).

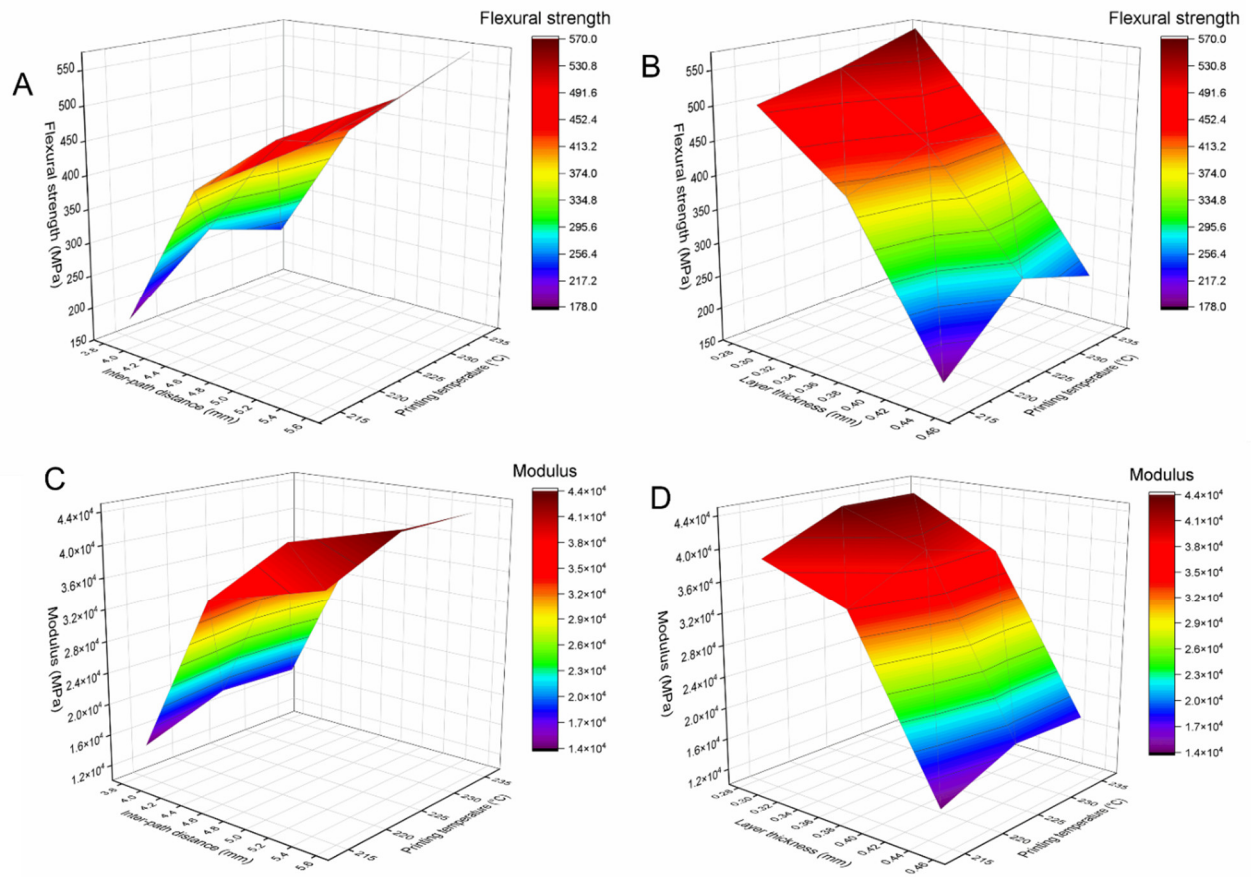

Figure S14. Response surface graphs of the relationship between A: Flexural strength  $\sigma_{flex}$ , inter-path distance, and printing temperature, and B: Flexural strength  $\sigma_{flex}$ , layer thickness, and printing temperature, C: Modulus  $E_{flex}$ , inter-path distance, and printing temperature, and D: Modulus  $E_{flex}$ , layer thickness, and printing temperature of the samples Specimens from F013 Printing conditions P126-P153 with  $D=0.9$  mm (PA12 as a polymer matrix).

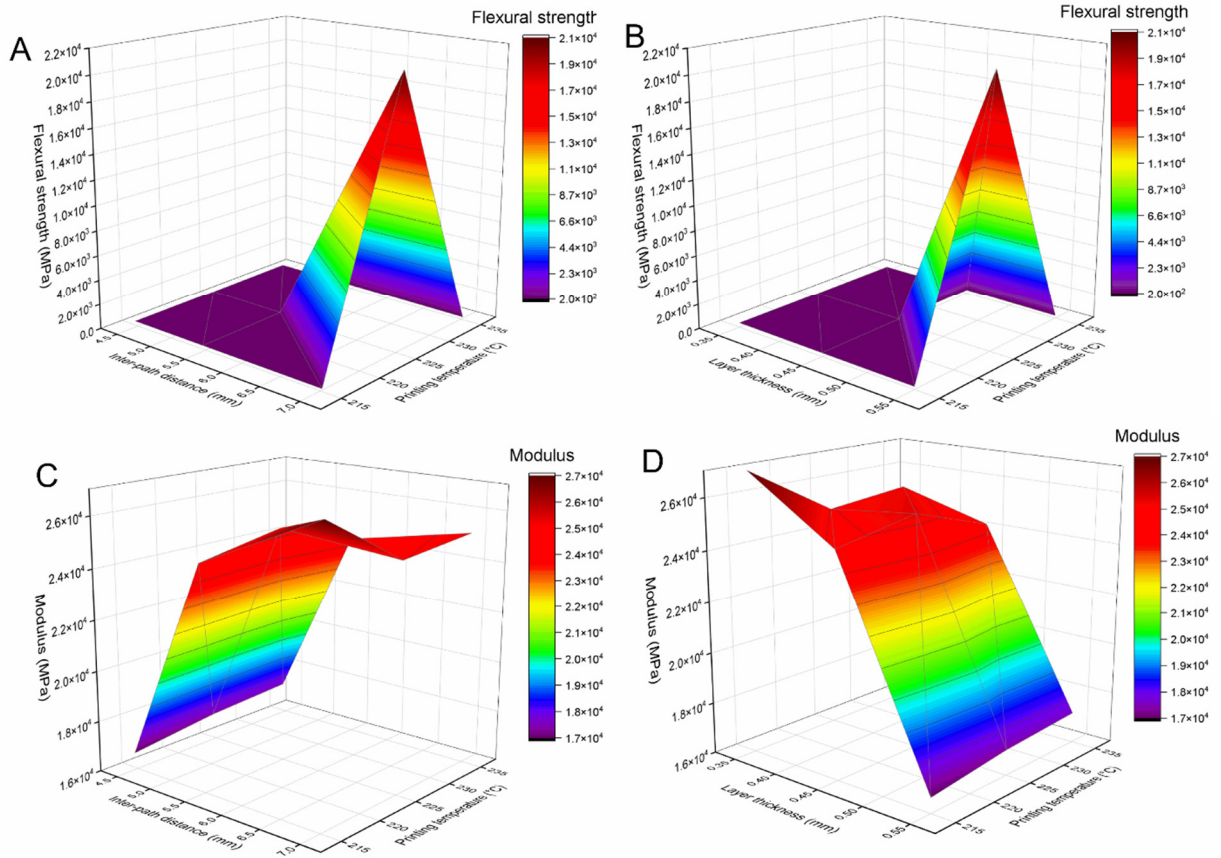

Figure S15. Response surface graphs of the relationship between A: Flexural strength  $\sigma_{flex}$ , inter-path distance, and printing temperature, and B: Flexural strength  $\sigma_{flex}$ , layer thickness, and printing temperature, C: Modulus  $E_{flex}$ , inter-path distance, and printing temperature, and D: Modulus  $E_{flex}$ , layer thickness, and printing temperature of the samples Specimens from F001 Printing conditions P001-P066 with  $D=1.1$  mm (PP as a polymer matrix).

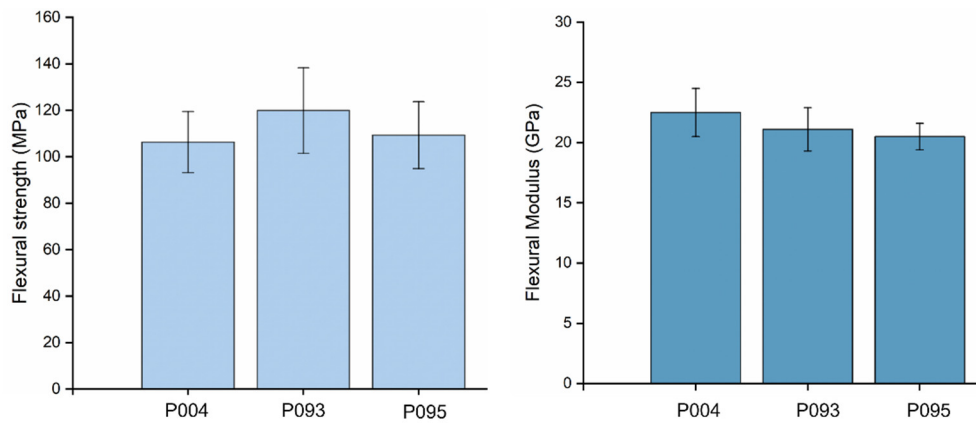

Figure S16. Flexural strength  $\sigma_{flex}$  and Flexural modulus  $E_{flex}$  of plasma-treated and untreated cCF-PP (Specimens F001, F002, and F003). The Printing conditions are highlighted in the plots.



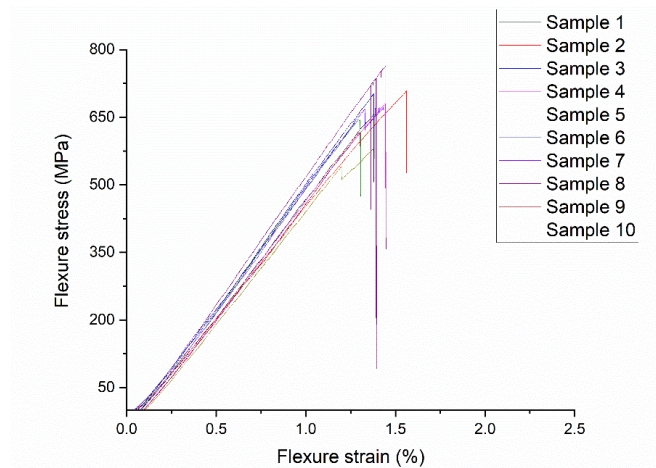

Figure S17. The sample failure mode of F013 Printing conditions P126 with  $D=0.9$  mm (PA12 as a matrix).

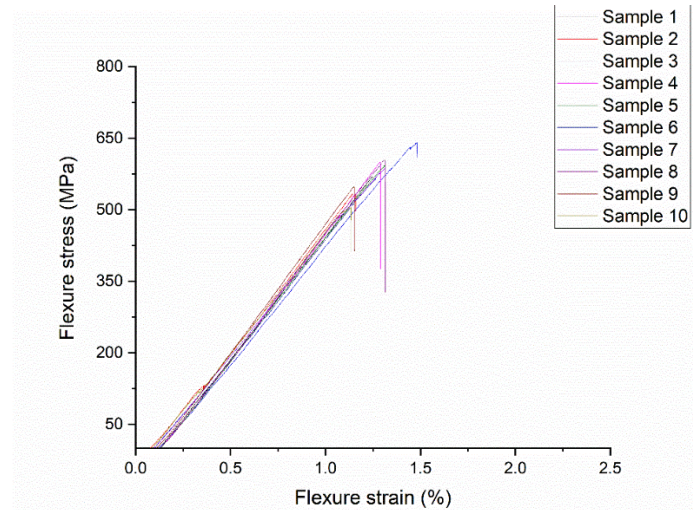

Figure S18. The sample failure mode of F014 Printing conditions P164 with  $D=0.7$  mm (PA12 as a matrix).

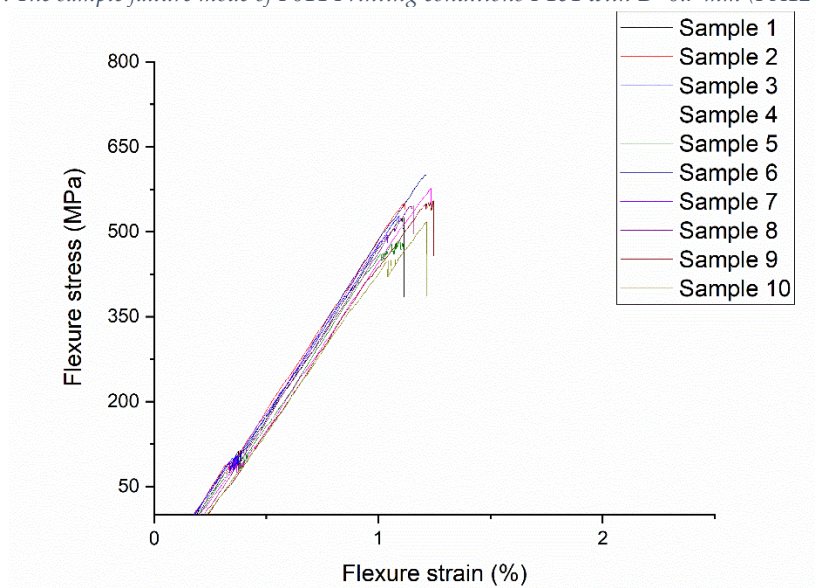

Figure S19. The sample failure mode of F017 Printing conditions P190 with  $D=0.6$  mm (PA12 as a matrix).



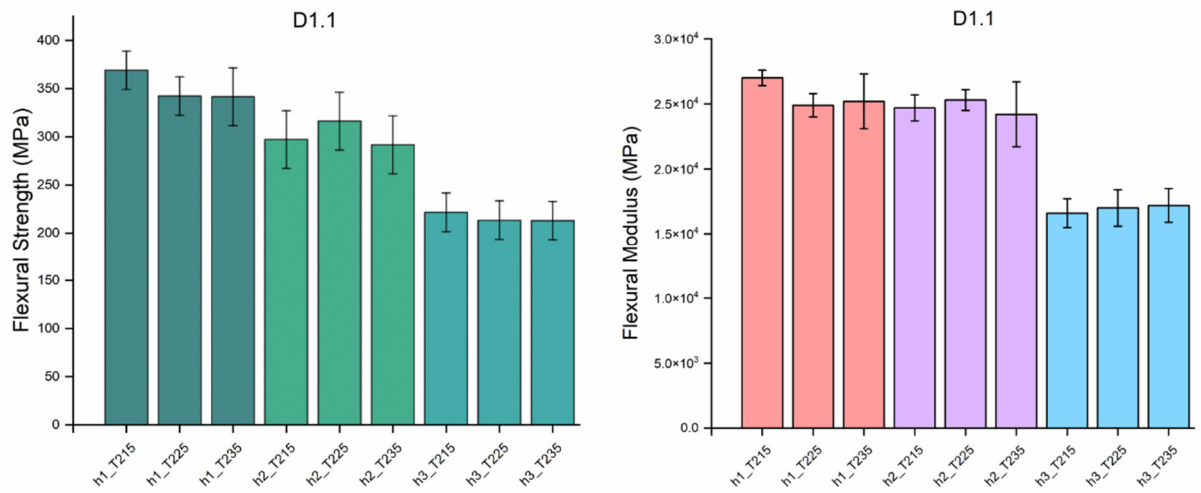

Figure S20. Flexural strength and modulus of the samples with filament diameter  $D=1.1$  mm.

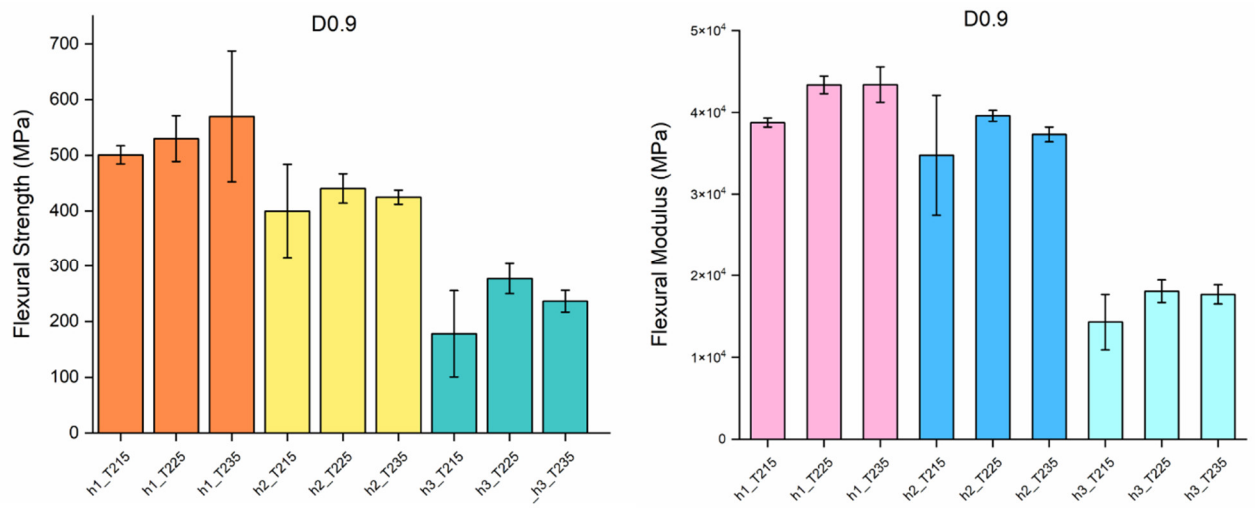

Figure S21. Flexural strength and modulus of the samples with  $D=0.9$  mm.

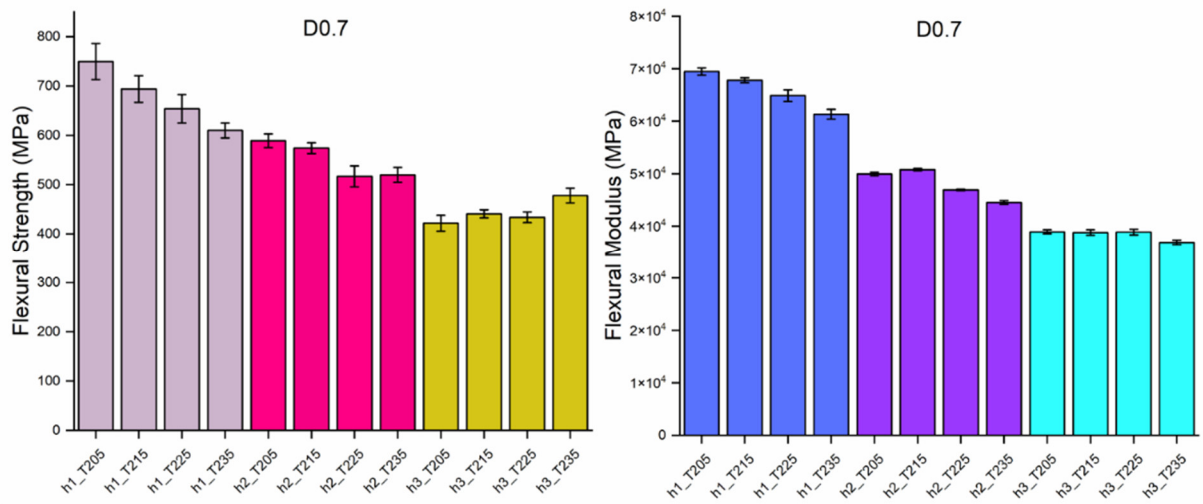

Figure S22. Flexural strength and modulus of the samples with  $D=0.7$  mm.

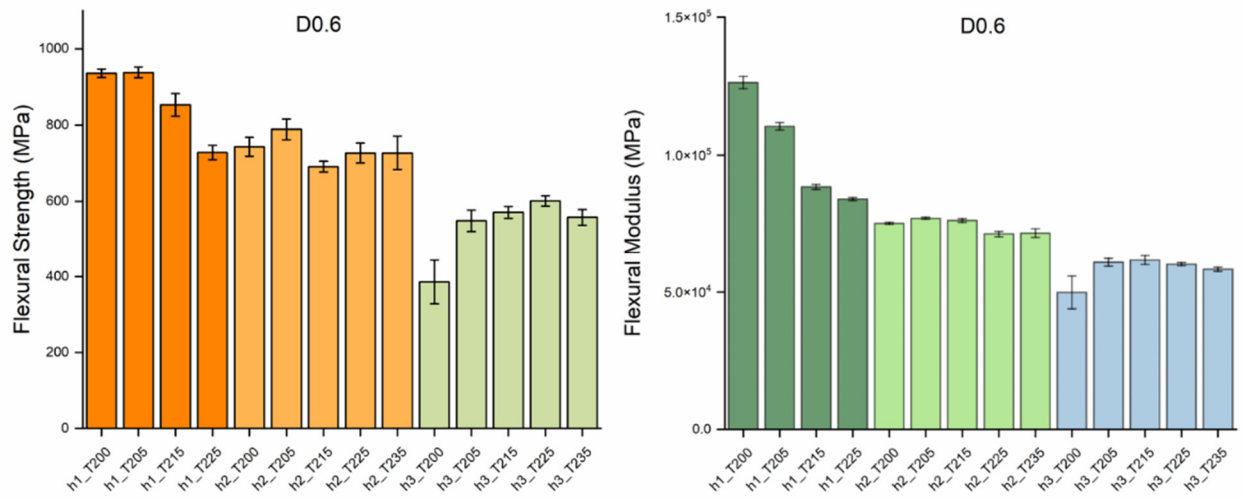

Figure S23. Flexural strength and modulus of the samples with D=0.6 mm.

Table S5. Flexural strength and modulus of the samples with different D, T,s, and h.

| D (mm) | Sample Code   | Flexural Modulus (GPa) | Flexural Strength (GPa) |
|--------|---------------|------------------------|-------------------------|
| 1.1    | D1.1_*h1_T215 | 27 ± 0.6               | 0.40 ± 0.02             |
|        | D1.1_h1_T225  | 25 ± 0.9               | 0.34 ± 0.02             |
|        | D1.1_h1_T235  | 25 ± 2.1               | 0.34 ± 0.03             |
|        | D1.1_*h2_T215 | 25 ± 1.0               | 0.30 ± 0.03             |
|        | D1.1_h2_T225  | 25 ± 0.8               | 0.31 ± 0.03             |
|        | D1.1_h2_T235  | 24 ± 2.5               | 0.30 ± 0.03             |
|        | D1.1_*h3_T215 | 17 ± 1.1               | 0.22 ± 0.02             |
|        | D1.1_h3_T225  | 17 ± 1.4               | 0.21 ± 0.02             |
|        | D1.1_h3_T235  | 17 ± 1.3               | 0.21 ± 0.02             |
| 0.9    | D0.9_h1_T215  | 39 ± 0.5               | 0.5 ± 0.01              |
|        | D0.9_h1_T225  | 43 ± 1.0               | 0.5 ± 0.04              |
|        | D0.9_h1_T235  | 43 ± 2.1               | 0.6 ± 0.12              |
|        | D0.9_h2_T215  | 35 ± 7.3               | 0.4 ± 0.08              |
|        | D0.9_h2_T225  | 40 ± 0.6               | 0.4 ± 0.03              |
|        | D0.9_h2_T235  | 37 ± 0.9               | 0.4 ± 0.01              |
|        | D0.9_h3_T215  | 14 ± 3.3               | 0.2 ± 0.08              |
|        | D0.9_h3_T225  | 18 ± 1.3               | 0.3 ± 0.03              |
|        | D0.9_h3_T235  | 18 ± 1.1               | 0.2 ± 0.01              |
| 0.7    | D0.7_h1_T205  | 69 ± 0.7               | 0.7 ± 0.04              |
|        | D0.7_h1_T215  | 68 ± 0.5               | 0.7 ± 0.03              |
|        | D0.7_h1_T225  | 65 ± 1.1               | 0.7 ± 0.03              |
|        | D0.7_h1_T235  | 61 ± 0.9               | 0.6 ± 0.02              |
|        | D0.7_h2_T205  | 50 ± 0.3               | 0.6 ± 0.01              |
|        | D0.7_h2_T215  | 51 ± 0.2               | 0.6 ± 0.01              |

|            |              |           |            |
|------------|--------------|-----------|------------|
|            | D0.7_h2_T225 | 47 ± 0.1  | 0.5 ± 0.02 |
|            | D0.7_h2_T235 | 45 ± 0.4  | 0.5 ± 0.02 |
|            | D0.7_h3_T205 | 39 ± 0.4  | 0.4 ± 0.02 |
|            | D0.7_h3_T215 | 39 ± 0.5  | 0.4 ± 0.01 |
|            | D0.7_h3_T225 | 39 ± 0.5  | 0.4 ± 0.01 |
|            | D0.7_h3_T235 | 37 ± 0.4  | 0.5 ± 0.02 |
| <b>0.6</b> | D0.6_h1_T200 | 126 ± 2.2 | 0.9 ± 0.11 |
|            | D0.6_h1_T205 | 110 ± 1.3 | 0.9 ± 0.01 |
|            | D0.6_h1_T215 | 88 ± 0.9  | 0.9 ± 0.03 |
|            | D0.6_h1_T225 | 84 ± 0.5  | 0.7 ± 0.02 |
|            | D0.6_h2_T200 | 75 ± 0.4  | 0.7 ± 0.03 |
|            | D0.6_h2_T205 | 77 ± 0.4  | 0.8 ± 0.03 |
|            | D0.6_h2_T215 | 76 ± 0.7  | 0.7 ± 0.01 |
|            | D0.6_h2_T225 | 71 ± 0.9  | 0.7 ± 0.03 |
|            | D0.6_h2_T235 | 71 ± 1.5  | 0.7 ± 0.04 |
|            | D0.6_h3_T200 | 50 ± 1.9  | 0.4 ± 0.06 |
|            | D0.6_h3_T205 | 61 ± 1.4  | 0.5 ± 0.03 |
|            | D0.6_h3_T215 | 62 ± 1.6  | 0.6 ± 0.02 |
|            | D0.6_h3_T225 | 60 ± 0.6  | 0.6 ± 0.01 |
|            | D0.6_h3_T235 | 58 ± 0.7  | 0.6 ± 0.02 |

\* h1 means h1 & s1, h2 means h2 & s2, h3 means h3 & s3

## DSC analysis for the determination of the annealing parameters.

Table S6. DSC tests parameters.

|                | End Temperature (°C) | Heating/cooling rate (K/min) | Isotherm (min) |
|----------------|----------------------|------------------------------|----------------|
| <b>Start</b>   | 25                   | 10                           |                |
| <b>Heating</b> | 250                  | 10                           | 10             |
| <b>Cooling</b> | 25                   | 10                           | 10             |
| <b>Heating</b> | 250                  | 10                           | 10             |
| <b>Cooling</b> | 25                   | 10                           |                |

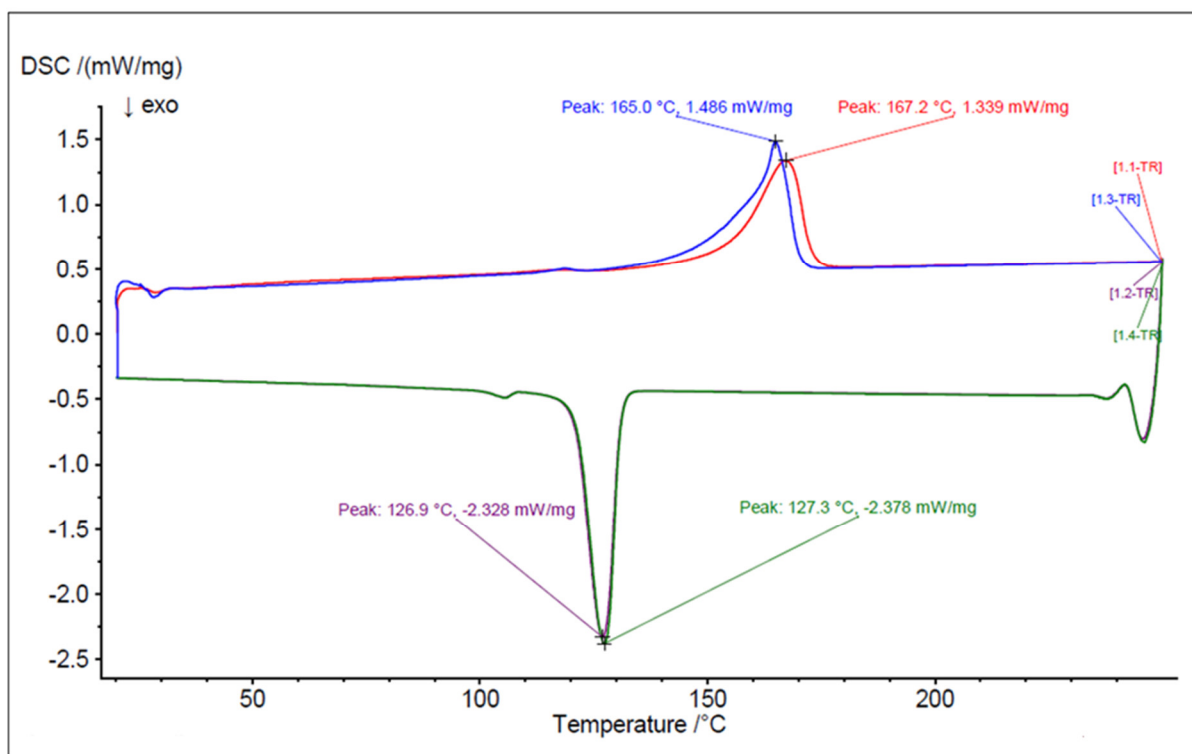

Figure S24. DSC results of PP.

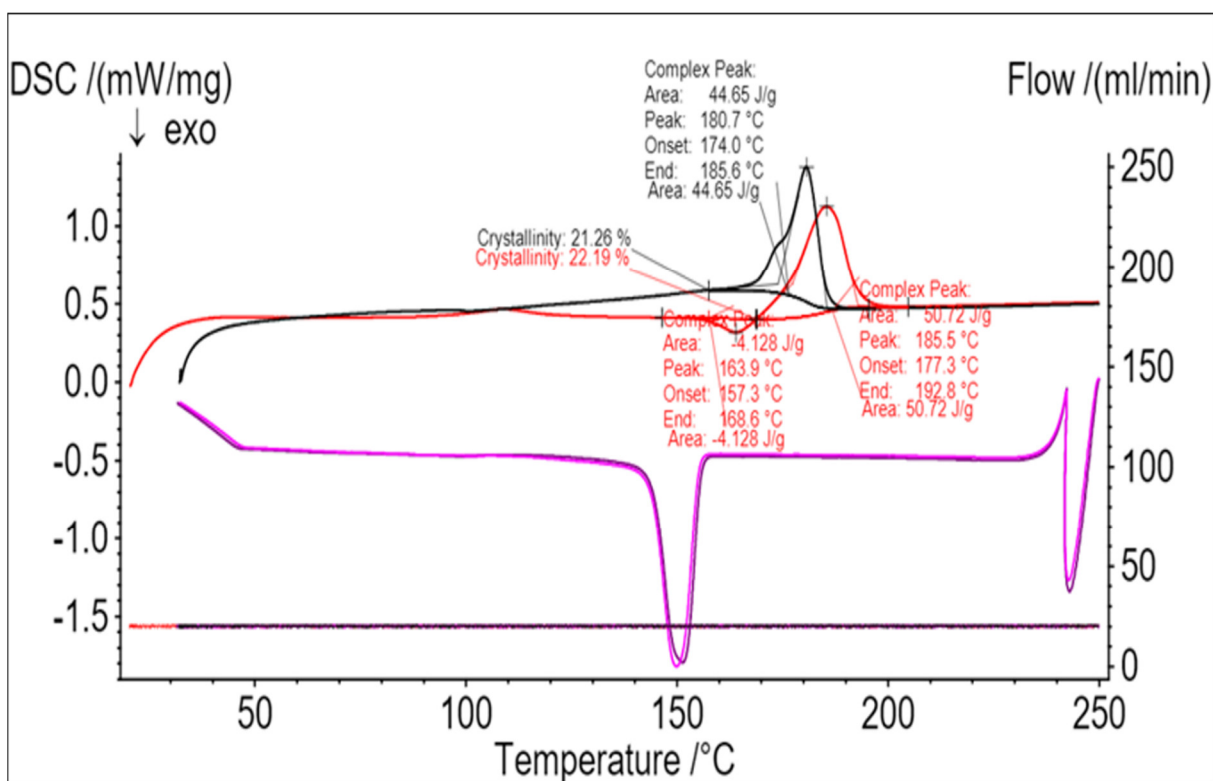

Figure S25. DSC results of PA12.

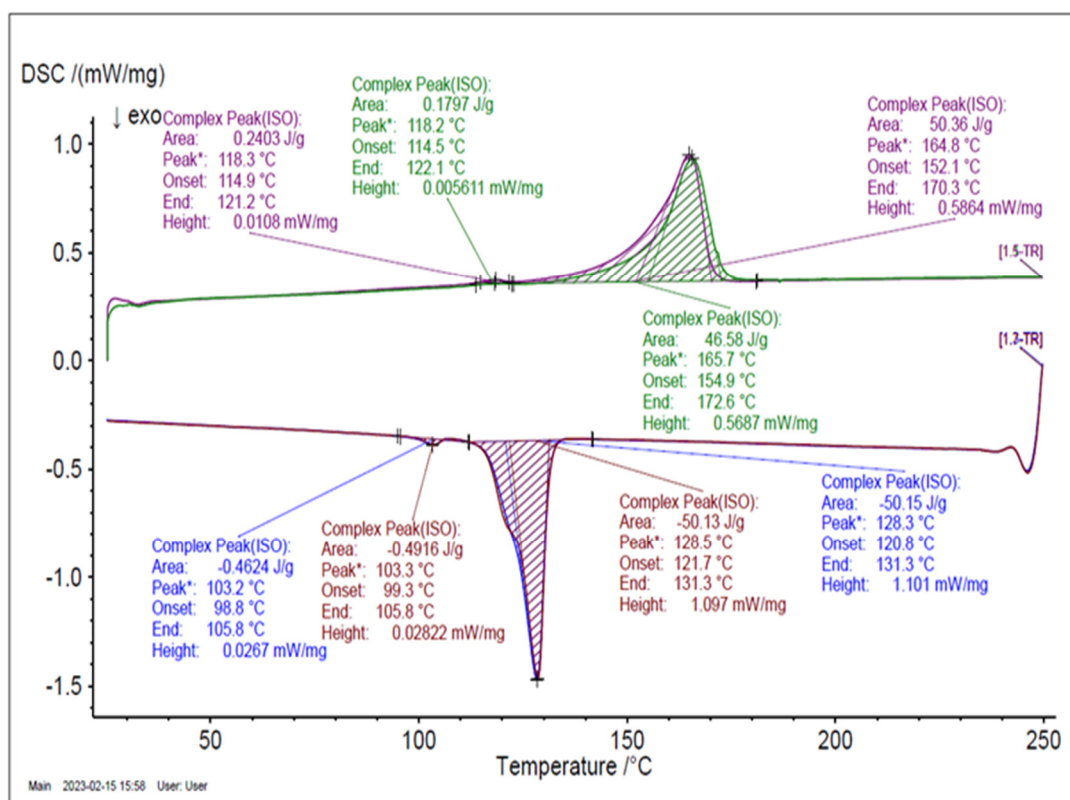

Figure S26. DSC of unannealed cCF-PP ( peak \*:the location of the peak maximum).

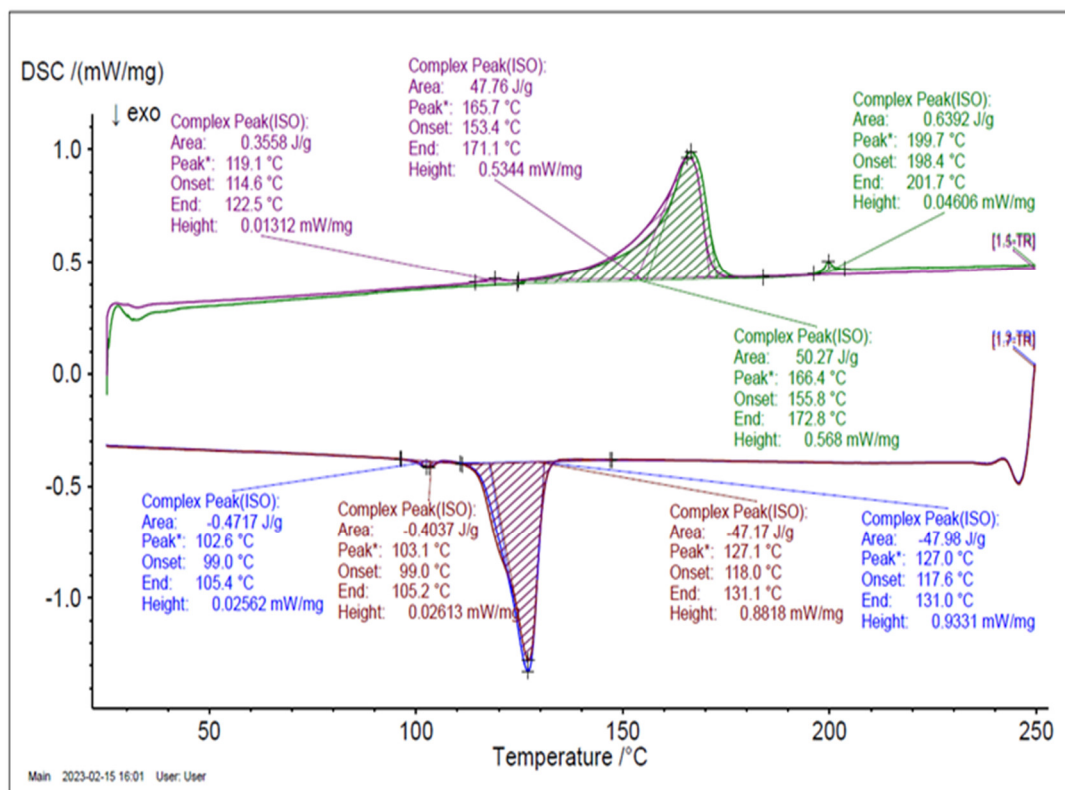

Figure S27. DSC of annealed cCF-PP ( peak \*:the location of the peak maximum).



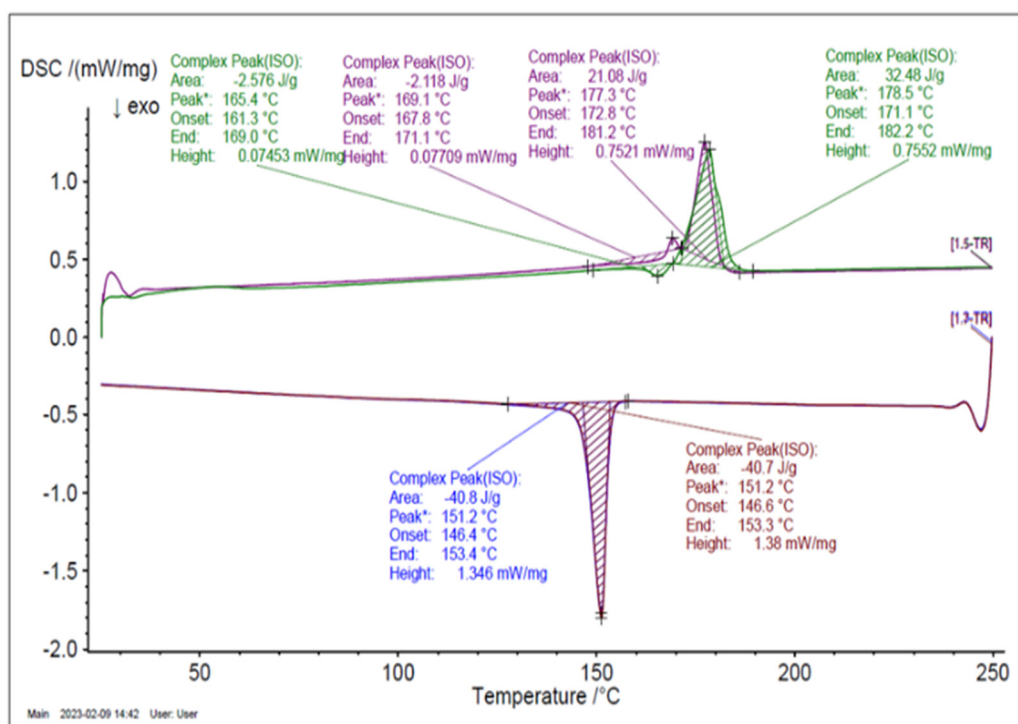

Figure S28. DSC result of unannealed cCF-PA12 ( peak \*:the location of the peak maximum).

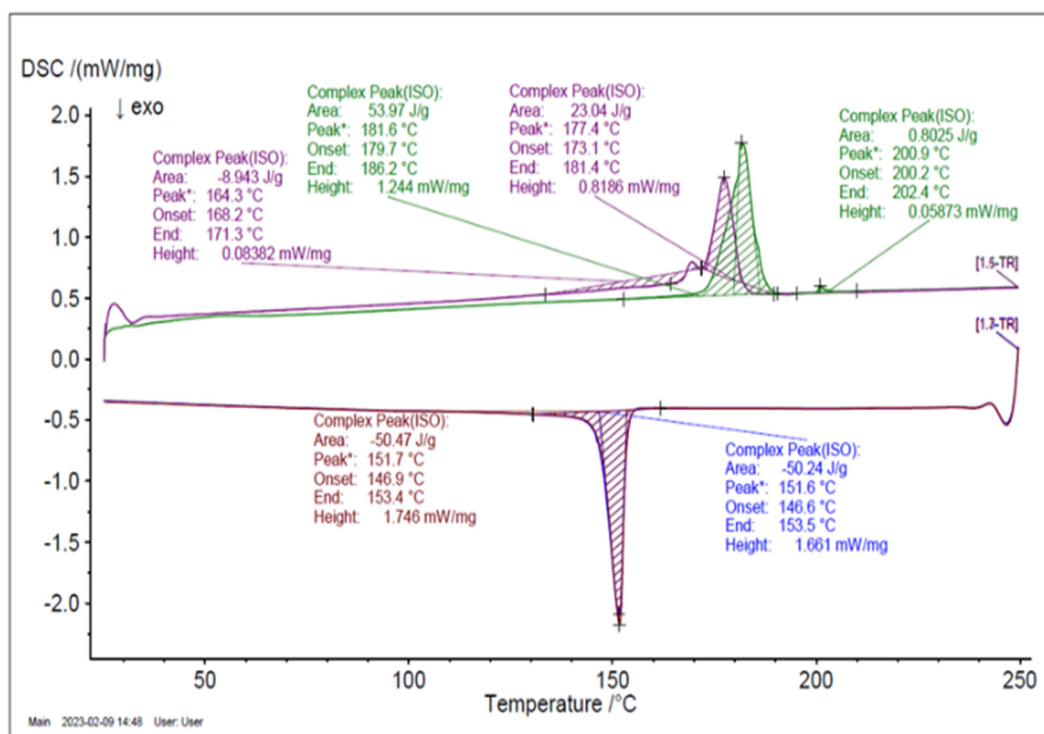

Figure S29. DSC result of annealed cCF-PA12 ( peak \*:the location of the peak maximum).

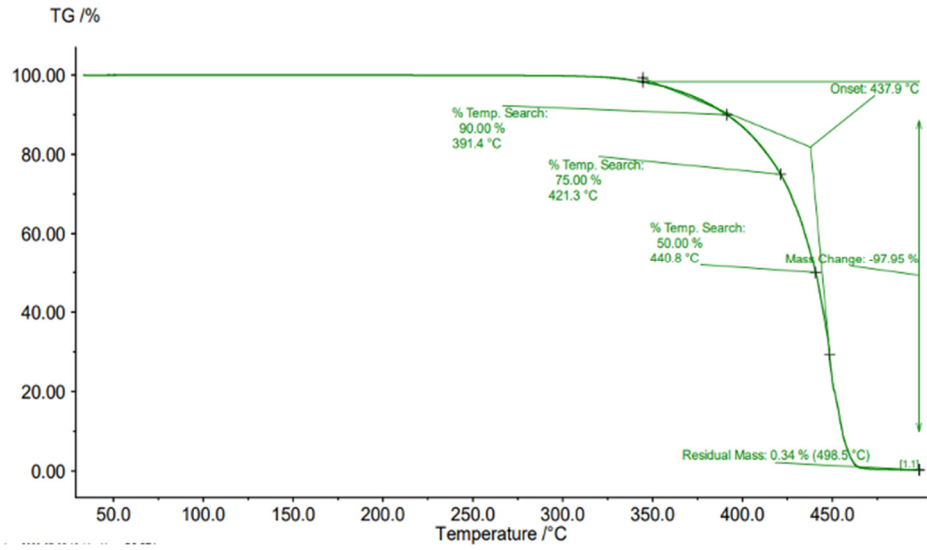

Figure S30. TGA result of PP.

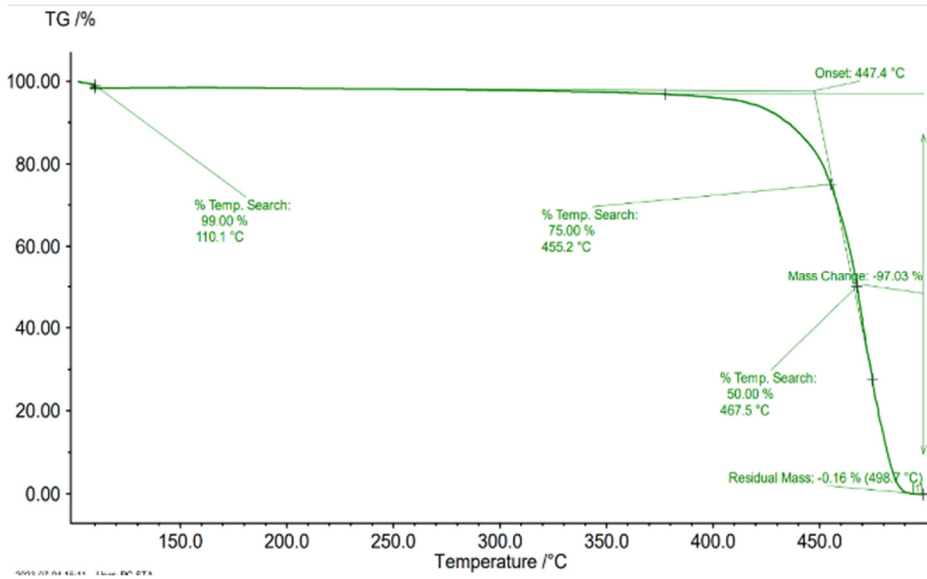

Figure S31. TGA result of PA12.

Table S7. Estimated flexural properties of the cCF composites for varying fiber fractions.

| $v_f$ (%) | cCF-PA12         |                       | cCF-PP           |                       |
|-----------|------------------|-----------------------|------------------|-----------------------|
|           | $E_{flex}$ (GPa) | $\sigma_{flex}$ (GPa) | $E_{flex}$ (GPa) | $\sigma_{flex}$ (GPa) |
| 10        | 21.70            | 0.3                   | 14.10            | 0.08                  |
| 20        | 42.10            | 0.6                   | 27.60            | 0.16                  |
| 30        | 62.40            | 0.8                   | 41.10            | 0.24                  |
| 40        | 82.80            | 1.1                   | 54.60            | 0.32                  |
| 50        | 103.20           | 1.3                   | 68.10            | 0.40                  |



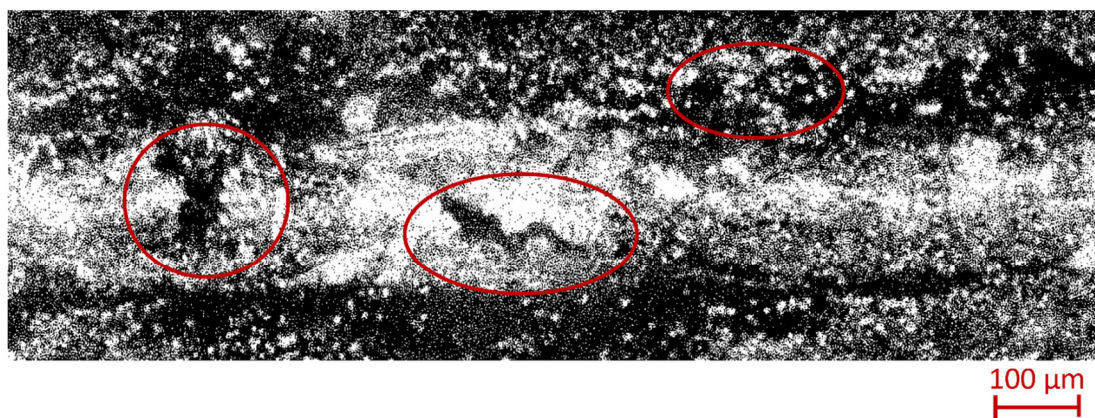

A

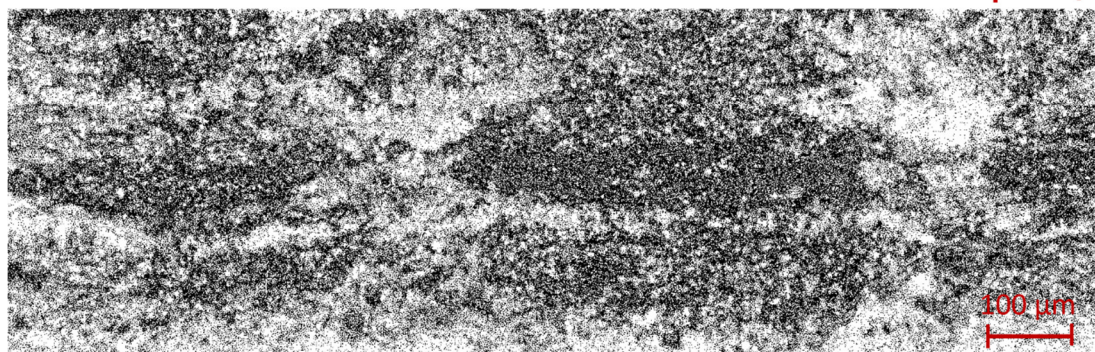

B

Figure S32. ImageJ results of A. Non-annealed cCF-PP (P62) sample and B. An annealed cCF-PP sample at 140 °C.

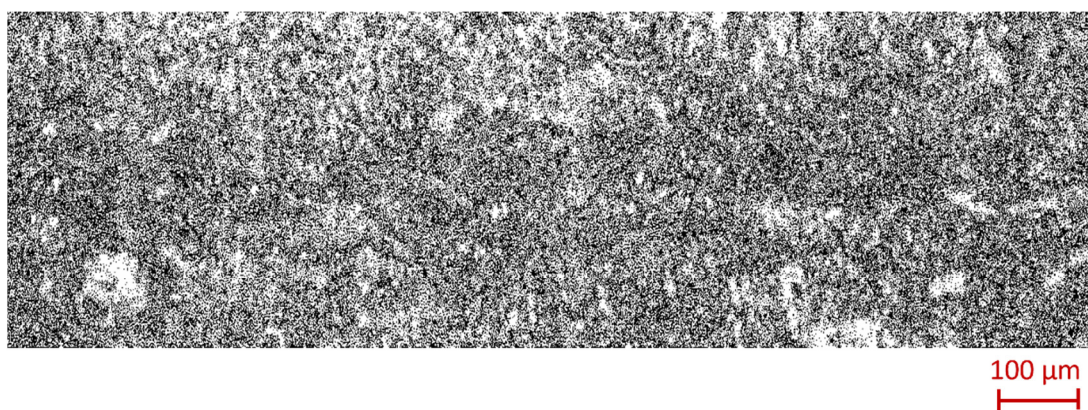

A

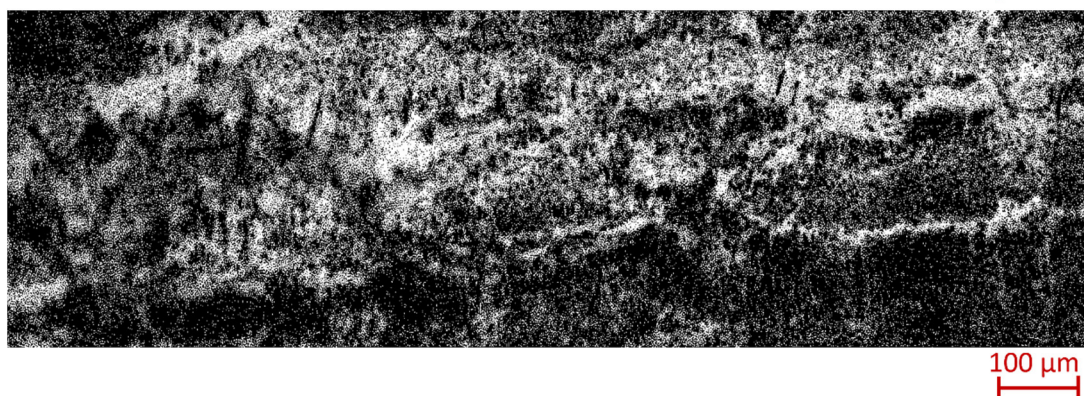

B

Figure S33. ImageJ results of A. Non-annealed cCF-PA12 (P142) sample and B. An annealed cCF-PA12 sample at 165 °C.



Table S8. Printing conditions for the test specimens.

| Name | T_nozzle<br>[°C] | T_bed<br>[°C] | s<br>[mm] | h<br>[mm] | Filament | v_line<br>[mm/min] | v_curve<br>[mm/min] |
|------|------------------|---------------|-----------|-----------|----------|--------------------|---------------------|
| P001 | 230              | 60            | 1.30      | 0.45      | F001     | 60                 | 60                  |
| P002 | 230              | 80            | 1.67      | 0.35      | F001     | 120                | 30                  |
| P003 | 230              | 80            | 1.30      | 0.45      | F001     | 60                 | 60                  |
| P004 | 230              | 80            | 1.30      | 0.45      | F001     | 120                | 30                  |
| P005 | 230              | 80            | 1.06      | 0.55      | F001     | 120                | 30                  |
| P006 | 230              | 80            | 1.06      | 0.55      | F001     | 60                 | 60                  |
| P007 | 230              | 80            | 1.06      | 0.55      | F001     | 60                 | 60                  |
| P008 | 230              | 80            | 1.06      | 0.55      | F001     | 60                 | 60                  |
| P009 | 230              | 80            | 1.06      | 0.55      | F001     | 60                 | 60                  |
| P010 | 230              | 80            | 1.06      | 0.55      | F001     | 60                 | 60                  |
| P011 | 230              | 60            | 1.30      | 0.45      | F001     | 60                 | 60                  |
| P012 | 240              | 80            | 1.06      | 0.55      | F001     | 60                 | 60                  |
| P013 | 235              | 80            | 1.06      | 0.55      | F001     | 60                 | 60                  |
| P014 | 235              | 80            | 1.06      | 0.55      | F001     | 60                 | 60                  |
| P015 | 240              | 80            | 1.06      | 0.55      | F001     | 60                 | 60                  |
| P016 | 245              | 80            | 1.06      | 0.55      | F001     | 60                 | 60                  |
| P017 | 245              | 80            | 1.06      | 0.55      | F001     | 60                 | 60                  |
| P018 | 220              | 80            | 1.06      | 0.55      | F001     | 60                 | 60                  |
| P019 | 210              | 80            | 1.06      | 0.55      | F001     | 60                 | 60                  |
| P020 | 210              | 80            | 1.06      | 0.55      | F001     | 60                 | 60                  |
| P021 | 200              | 80            | 1.06      | 0.55      | F001     | 60                 | 60                  |
| P022 | 200              | 80            | 1.06      | 0.55      | F001     | 60                 | 60                  |
| P023 | 220              | 80            | 1.06      | 0.55      | F001     | 60                 | 60                  |
| P024 | 220              | 80            | 1.06      | 0.55      | F001     | 60                 | 60                  |
| P025 | 220              | 80            | 1.06      | 0.55      | F001     | 120                | 60                  |
| P026 | 230              | 80            | 1.06      | 0.55      | F001     | 120                | 60                  |
| P027 | 230              | 80            | 1.06      | 0.55      | F001     | 120                | 60                  |
| P028 | 230              | 80            | 1.06      | 0.55      | F001     | 120                | 60                  |
| P029 | 230              | 80            | 1.06      | 0.55      | F001     | 120                | 60                  |
| P030 | 230              | 80            | 1.06      | 0.55      | F001     | 120                | 60                  |
| P031 | 230              | 80            | 1.06      | 0.55      | F001     | 120                | 30                  |
| P032 | 230              | 80            | 1.06      | 0.55      | F001     | 120                | 30                  |
| P033 | 230              | 80            | 1.06      | 0.55      | F001     | 120                | 30                  |
| P034 | 230              | 80            | 1.06      | 0.55      | F001     | 120                | 30                  |
| P035 | 230              | 80            | 1.06      | 0.55      | F001     | 120                | 30                  |
| P036 | 230              | 80            | 1.06      | 0.55      | F001     | 120                | 30                  |
| P037 | 230              | 80            | 1.30      | 0.45      | F001     | 120                | 30                  |
| P038 | 230              | 80            | 1.30      | 0.45      | F001     | 120                | 30                  |
| P039 | 230              | 80            | 1.30      | 0.45      | F001     | 120                | 30                  |
| P040 | 230              | 80            | 1.30      | 0.45      | F001     | 120                | 30                  |
| P041 | 230              | 80            | 1.30      | 0.45      | F001     | 120                | 30                  |
| P042 | 230              | 80            | 1.30      | 0.45      | F001     | 120                | 30                  |

|      |     |     |      |      |      |     |    |
|------|-----|-----|------|------|------|-----|----|
| P043 | 230 | 80  | 1.30 | 0.45 | F001 | 120 | 30 |
| P044 | 230 | 80  | 1.30 | 0.45 | F001 | 120 | 30 |
| P045 | 230 | 80  | 1.30 | 0.45 | F001 | 120 | 30 |
| P046 | 235 | 80  | 1.30 | 0.45 | F001 | 120 | 30 |
| P047 | 235 | 80  | 1.30 | 0.45 | F001 | 120 | 30 |
| P048 | 235 | 80  | 1.30 | 0.45 | F001 | 120 | 30 |
| P049 | 235 | 80  | 1.30 | 0.45 | F001 | 120 | 30 |
| P050 | 235 | 80  | 1.30 | 0.45 | F001 | 120 | 30 |
| P051 | 235 | 80  | 1.30 | 0.45 | F001 | 120 | 30 |
| P052 | 235 | 85  | 1.30 | 0.45 | F001 | 120 | 30 |
| P053 | 235 | 85  | 1.30 | 0.45 | F001 | 120 | 30 |
| P054 | 235 | 85  | 1.30 | 0.45 | F001 | 120 | 30 |
| P055 | 235 | 85  | 1.30 | 0.45 | F001 | 120 | 30 |
| P056 | 235 | 85  | 1.30 | 0.45 | F001 | 120 | 30 |
| P057 | 235 | 85  | 1.30 | 0.45 | F001 | 120 | 30 |
| P058 | 235 | 85  | 1.30 | 0.45 | F001 | 120 | 30 |
| P059 | 235 | 85  | 1.30 | 0.45 | F001 | 120 | 30 |
| P060 | 235 | 85  | 1.30 | 0.45 | F001 | 120 | 30 |
| P061 | 235 | 85  | 1.30 | 0.45 | F001 | 120 | 30 |
| P062 | 235 | 85  | 1.30 | 0.45 | F001 | 120 | 30 |
| p063 | 235 | 85  | 1.30 | 0.45 | F001 | 120 | 30 |
| P064 | 235 | 85  | 1.30 | 0.45 | F001 | 120 | 30 |
| P065 | 235 | 85  | 1.30 | 0.45 | F001 | 120 | 30 |
| P066 | 235 | 85  | 1.30 | 0.45 | F001 | 120 | 30 |
| P067 | 235 | 110 | 1.30 | 0.45 | F005 | 120 | 30 |
| P068 | 235 | 110 | 1.30 | 0.45 | F005 | 120 | 30 |
| P069 | 235 | 110 | 1.30 | 0.45 | F005 | 120 | 30 |
| P070 | 235 | 110 | 1.30 | 0.45 | F005 | 120 | 30 |
| P071 | 235 | 110 | 1.30 | 0.45 | F005 | 120 | 30 |
| P072 | 235 | 110 | 1.30 | 0.45 | F005 | 120 | 30 |
| P073 | 245 | 110 | 1.30 | 0.45 | F005 | 120 | 30 |
| P074 | 245 | 110 | 1.30 | 0.45 | F005 | 120 | 30 |
| P075 | 225 | 110 | 1.30 | 0.45 | F005 | 120 | 30 |
| P076 | 225 | 110 | 1.30 | 0.45 | F005 | 120 | 30 |
| P077 | 245 | 110 | 1.30 | 0.45 | F005 | 120 | 30 |
| P078 | 245 | 110 | 1.30 | 0.45 | F005 | 120 | 30 |
| P079 | 245 | 110 | 1.30 | 0.45 | F005 | 120 | 30 |
| P080 | 235 | 110 | 1.30 | 0.45 | F005 | 120 | 30 |
| P081 | 235 | 110 | 1.30 | 0.45 | F005 | 120 | 30 |
| P082 | 235 | 110 | 1.30 | 0.45 | F005 | 120 | 30 |
| P083 | 245 | 110 | 1.60 | 0.55 | F005 | 120 | 30 |
| P084 | 245 | 110 | 1.40 | 0.55 | F005 | 120 | 30 |
| P085 | 245 | 110 | 1.40 | 0.55 | F005 | 120 | 30 |
| P086 | 235 | 80  | 1.40 | 0.45 | F004 | 120 | 30 |
| P087 | 235 | 80  | 1.40 | 0.45 | F004 | 120 | 30 |
| P088 | 235 | 80  | 1.30 | 0.45 | F004 | 120 | 30 |
| P089 | 235 | 80  | 1.30 | 0.45 | F004 | 120 | 30 |



|      |     |     |      |      |      |     |    |
|------|-----|-----|------|------|------|-----|----|
| P090 | 235 | 80  | 1.40 | 0.45 | F004 | 120 | 30 |
| P091 | 235 | 80  | 1.40 | 0.45 | F004 | 120 | 30 |
| P092 | 235 | 80  | 1.30 | 0.45 | F004 | 120 | 30 |
| P093 | 235 | 80  | 1.30 | 0.45 | F002 | 120 | 30 |
| P094 | 235 | 80  | 1.30 | 0.45 | F003 | 120 | 30 |
| P095 | 235 | 80  | 1.30 | 0.45 | F003 | 120 | 30 |
| P096 | 235 | 80  | 1.30 | 0.45 | F002 | 120 | 30 |
| P097 | 235 | 80  | 1.30 | 0.45 | F004 | 120 | 30 |
| P098 | 235 | 80  | 1.30 | 0.45 | F004 | 120 | 30 |
| P099 | 235 | 80  | 1.30 | 0.45 | F004 | 120 | 30 |
| P100 | 235 | 80  | 1.30 | 0.45 | F004 | 120 | 30 |
| P101 | 235 | 80  | 1.30 | 0.45 | F004 | 120 | 30 |
| P102 | 235 | 80  | 1.30 | 0.45 | F004 | 120 | 30 |
| P103 | 235 | 110 | 1.30 | 0.45 | F008 | 120 | 30 |
| P104 | 235 | 110 | 1.30 | 0.45 | F008 | 120 | 30 |
| P105 | 235 | 110 | 1.30 | 0.45 | F006 | 120 | 30 |
| P106 | 245 | 110 | 1.30 | 0.45 | F006 | 120 | 30 |
| P107 | 225 | 110 | 1.30 | 0.45 | F007 | 120 | 30 |
| P108 | 225 | 110 | 1.30 | 0.45 | F007 | 120 | 30 |
| P109 | 225 | 110 | 1.30 | 0.45 | F007 | 120 | 30 |
| P110 | 215 | 110 | 1.30 | 0.45 | F007 | 120 | 30 |
| P111 | 215 | 110 | 1.30 | 0.45 | F007 | 120 | 30 |
| P112 | 215 | 110 | 1.30 | 0.45 | F007 | 120 | 30 |
| P113 | 215 | 110 | 1.67 | 0.35 | F009 | 120 | 30 |
| P114 | 215 | 110 | 1.67 | 0.35 | F009 | 120 | 30 |
| P115 | 215 | 110 | 1.67 | 0.35 | F009 | 120 | 30 |
| P116 | 215 | 110 | 1.67 | 0.35 | F011 | 120 | 30 |
| P117 | 215 | 110 | 1.67 | 0.35 | F011 | 120 | 30 |
| P118 | 215 | 110 | 1.67 | 0.35 | F011 | 120 | 30 |
| P119 | 215 | 110 | 1.67 | 0.35 | F011 | 120 | 30 |
| P120 | 215 | 110 | 1.67 | 0.35 | F012 | 120 | 30 |
| P121 | 215 | 110 | 1.67 | 0.35 | F012 | 120 | 30 |
| P122 | 215 | 110 | 1.67 | 0.35 | F010 | 120 | 30 |
| P123 | 215 | 110 | 1.67 | 0.35 | F010 | 120 | 30 |
| P124 | 215 | 110 | 1.67 | 0.35 | F010 | 120 | 30 |
| P125 | 215 | 110 | 1.67 | 0.35 | F010 | 120 | 30 |
| P126 | 215 | 110 | 1.37 | 0.29 | F013 | 120 | 30 |
| P127 | 215 | 110 | 1.37 | 0.29 | F013 | 120 | 30 |
| P128 | 215 | 110 | 1.37 | 0.29 | F013 | 120 | 30 |
| P129 | 225 | 110 | 1.37 | 0.29 | F013 | 120 | 30 |
| P130 | 225 | 110 | 1.37 | 0.29 | F013 | 120 | 30 |
| P131 | 225 | 110 | 1.37 | 0.29 | F013 | 120 | 30 |
| P132 | 235 | 110 | 1.37 | 0.29 | F013 | 120 | 30 |
| P133 | 235 | 110 | 1.37 | 0.29 | F013 | 120 | 30 |
| P134 | 235 | 110 | 1.37 | 0.29 | F013 | 120 | 30 |
| P135 | 235 | 110 | 1.06 | 0.37 | F013 | 120 | 30 |
| P136 | 235 | 110 | 1.06 | 0.37 | F013 | 120 | 30 |

|      |     |     |      |      |      |     |    |
|------|-----|-----|------|------|------|-----|----|
| P137 | 235 | 110 | 1.06 | 0.37 | F013 | 120 | 30 |
| P138 | 235 | 110 | 1.06 | 0.37 | F013 | 120 | 30 |
| P139 | 225 | 110 | 1.06 | 0.37 | F013 | 120 | 30 |
| P140 | 225 | 110 | 1.06 | 0.37 | F013 | 120 | 30 |
| P141 | 225 | 110 | 1.06 | 0.37 | F013 | 120 | 30 |
| P142 | 215 | 110 | 1.06 | 0.37 | F013 | 120 | 30 |
| P143 | 215 | 110 | 1.06 | 0.37 | F013 | 120 | 30 |
| P144 | 215 | 110 | 1.06 | 0.37 | F013 | 120 | 30 |
| P145 | 215 | 110 | 0.87 | 0.45 | F013 | 120 | 30 |
| P146 | 215 | 110 | 0.87 | 0.45 | F013 | 120 | 30 |
| P147 | 215 | 110 | 0.87 | 0.45 | F013 | 120 | 30 |
| P148 | 225 | 110 | 0.87 | 0.45 | F013 | 120 | 30 |
| P149 | 225 | 110 | 0.87 | 0.45 | F013 | 120 | 30 |
| P150 | 225 | 110 | 0.87 | 0.45 | F013 | 120 | 30 |
| P151 | 235 | 110 | 0.87 | 0.45 | F013 | 120 | 30 |
| P152 | 235 | 110 | 0.87 | 0.45 | F013 | 120 | 30 |
| P153 | 235 | 110 | 0.87 | 0.45 | F013 | 120 | 30 |
| P154 | 215 | 110 | 1.06 | 0.22 | F014 | 120 | 30 |
| P155 | 215 | 110 | 1.06 | 0.22 | F014 | 120 | 30 |
| P156 | 215 | 110 | 1.06 | 0.22 | F014 | 120 | 30 |
| P157 | 225 | 110 | 1.06 | 0.22 | F014 | 120 | 30 |
| P158 | 225 | 110 | 1.06 | 0.22 | F014 | 120 | 30 |
| P159 | 235 | 110 | 1.06 | 0.22 | F014 | 120 | 30 |
| P160 | 235 | 110 | 1.06 | 0.22 | F014 | 120 | 30 |
| P161 | 205 | 110 | 1.06 | 0.22 | F014 | 120 | 30 |
| P162 | 205 | 110 | 1.06 | 0.22 | F014 | 120 | 30 |
| P163 | 205 | 110 | 1.06 | 0.22 | F014 | 120 | 30 |
| P164 | 215 | 110 | 0.83 | 0.29 | F014 | 120 | 30 |
| P165 | 215 | 110 | 0.83 | 0.29 | F014 | 120 | 30 |
| P166 | 225 | 110 | 0.83 | 0.29 | F014 | 120 | 30 |
| P167 | 225 | 110 | 0.83 | 0.29 | F014 | 120 | 30 |
| P168 | 235 | 110 | 0.83 | 0.29 | F014 | 120 | 30 |
| P169 | 235 | 110 | 0.83 | 0.29 | F014 | 120 | 30 |
| P170 | 205 | 110 | 0.83 | 0.29 | F014 | 120 | 30 |
| P171 | 205 | 110 | 0.83 | 0.29 | F014 | 120 | 30 |
| P172 | 205 | 110 | 0.68 | 0.35 | F014 | 120 | 30 |
| P173 | 205 | 110 | 0.68 | 0.35 | F014 | 120 | 30 |
| P174 | 215 | 110 | 0.68 | 0.35 | F014 | 120 | 30 |
| P175 | 215 | 110 | 0.68 | 0.35 | F014 | 120 | 30 |
| P176 | 225 | 110 | 0.68 | 0.35 | F014 | 120 | 30 |
| P177 | 225 | 110 | 0.68 | 0.35 | F014 | 120 | 30 |
| P178 | 235 | 110 | 0.68 | 0.35 | F014 | 120 | 30 |
| P179 | 235 | 110 | 0.68 | 0.35 | F014 | 120 | 30 |
| P180 | 235 | 110 | 0.68 | 0.35 | F014 | 120 | 30 |
| P181 | 225 | 110 | 0.68 | 0.35 | F014 | 120 | 30 |
| P182 | 215 | 110 | 0.68 | 0.35 | F014 | 120 | 30 |
| P183 | 205 | 110 | 0.68 | 0.35 | F014 | 120 | 30 |

|      |     |     |      |      |      |     |    |
|------|-----|-----|------|------|------|-----|----|
| P184 | 215 | 110 | 0.91 | 0.19 | F016 | 120 | 30 |
| P185 | 215 | 110 | 0.71 | 0.25 | F017 | 120 | 30 |
| P186 | 215 | 110 | 0.71 | 0.25 | F017 | 120 | 30 |
| P187 | 225 | 110 | 0.71 | 0.25 | F017 | 120 | 30 |
| P188 | 225 | 110 | 0.71 | 0.25 | F017 | 120 | 30 |
| P189 | 205 | 110 | 0.71 | 0.25 | F017 | 120 | 30 |
| P190 | 205 | 110 | 0.71 | 0.25 | F017 | 120 | 30 |
| P191 | 195 | 110 | 0.71 | 0.25 | F017 | 120 | 30 |
| P192 | 200 | 110 | 0.71 | 0.25 | F017 | 120 | 30 |
| P193 | 235 | 110 | 0.71 | 0.25 | F017 | 120 | 30 |
| P194 | 235 | 110 | 0.71 | 0.25 | F017 | 120 | 30 |
| P195 | 205 | 110 | 0.58 | 0.30 | F017 | 120 | 30 |
| P196 | 205 | 110 | 0.58 | 0.30 | F017 | 120 | 30 |
| P197 | 205 | 110 | 0.58 | 0.30 | F017 | 120 | 30 |
| P198 | 215 | 110 | 0.58 | 0.30 | F017 | 120 | 30 |
| P199 | 215 | 110 | 0.58 | 0.30 | F017 | 120 | 30 |
| P200 | 225 | 110 | 0.58 | 0.30 | F017 | 120 | 30 |
| P201 | 225 | 110 | 0.58 | 0.30 | F017 | 120 | 30 |
| P202 | 235 | 110 | 0.58 | 0.30 | F017 | 120 | 30 |
| P203 | 235 | 110 | 0.58 | 0.30 | F017 | 120 | 30 |
| P204 | 205 | 110 | 0.91 | 0.19 | F017 | 120 | 30 |
| P205 | 205 | 110 | 0.91 | 0.19 | F017 | 120 | 30 |
| P206 | 215 | 110 | 0.91 | 0.19 | F017 | 120 | 30 |
| P207 | 225 | 110 | 0.91 | 0.19 | F017 | 120 | 30 |
| P208 | 225 | 110 | 0.91 | 0.19 | F017 | 120 | 30 |
| P209 | 235 | 110 | 0.91 | 0.19 | F017 | 120 | 30 |
| P210 | 235 | 110 | 0.91 | 0.19 | F017 | 120 | 30 |
| P211 | 200 | 110 | 0.91 | 0.19 | F017 | 120 | 30 |
| P212 | 200 | 110 | 0.91 | 0.19 | F017 | 120 | 30 |
| P213 | 200 | 110 | 0.71 | 0.25 | F017 | 120 | 30 |
| P214 | 200 | 110 | 0.58 | 0.3  | F017 | 120 | 30 |
| P215 | 200 | 110 | 0.58 | 0.3  | F017 | 120 | 30 |

---
